# Supplementary material for: Response of arbuscular mycorrhizal fungal community in soil and roots to grazing differs in a wetland on the Qinghai-Tibet plateau
Source: PeerJ. 2020 Jun 19;8:e9375. doi: 10.7717/peerj.9375 (PMC7307571; doi:10.7717/peerj.9375)
Supplement: Supplemental Information 4 [file peerj-08-9375-s004.xlsx]

## Sheet: Sheet1
Table S2 Molecular identification of arbuscular mycorrhizal fungi at the 97% sequence identity level
			BlastN match against GenBank nt database					BlastN match against MaarjAM 18S database
OTU No.	Sequence	EMBL accession No.	GenBank accession NO.	Description	Query coverage	Identity (%)	E value	GenBank accession NO.	Query coverage	Identity (%)	E value	Order	Family	Genus	Species	Virtual taxon
OTU1	CCCAACTATCCCTATTAATCATTACGTCGATCCTAGAAACCAACAAAATAGAATCAAACGTCCTATTTCATTATTCCATGCTAATGTATTCAAGCGCGAGCCTGCTTTAAACACTCTAATTTTTTCAAAGTAACAGTCCTGATTTCCCACGACACCAAATTAATGACATCGTGGTTCGTCAGAAGGTAGGAATCAATTTGACCAGTACGTACCGAGGCACGACCGATCAACTGATCCCGAAATTCAACTACGAGCTTTTTAACTGCAACAACTTTAATATACGCTATTGGAGCTGGAATTACCGCGGCTGCTGGCACCAGACTTGCCCTCCAA	LR736402	JN009314.1	Uncultured Glomeromycota clone July-30 18S ribosomal RNA gene, partial sequence	100	100	9.24e-173	gb|EU123464	100	100	8.85e-177	Glomerales	Glomeraceae	Glomus	Glom 1B.8	VTX00135
OTU2	CCCAACTATCCCTATTAATCATTACATCGATCCTAGAAACCAACAAAATAGAATGCGATGTCCTATTTCATTATTCCATGCTAATGTATTCAAGCGTGAGCCTGCTTTAAACACTCTAATTTTTTCAAGGTAACAGTCCTAATTCCCTATAACATCAAATAAATGACATTATAGTTCTTTAGAAGGTGAGAACCAATAAAATCAGTACATACCAAGGCATGACCAACTAATTGATCCCGAAGTTCAACTACGAGCTTTTTAACTGCAACAACTTTAATATACGCTATTGGAGCTGGAATTACCGCGGCTGCTGGCACCAGACTTGCCCTCCAA	LR736403	EU340311.1	Uncultured Glomus clone PAF373 18S ribosomal RNA gene, partial sequence	100	100	9.24e-173	gb|EU340311	100	100	8.85e-177	Glomerales	Glomeraceae	Glomus	NF19	VTX00293
OTU3	CCCAACTATCCCTATTAATCATTACGTCAATCCTAGAAACCAACAAAATAGGTTTGAACGTCCTATTTCATTATTCCATGCTAATGTATTCAAGCAAATGCCTGCTTTAAACACTCTAATTTTTTCAAAGTAACAGTCCTGTTTCCCTGCAACACCAAATTAATGACATTACAGTTCTACAGAAAGGAGGAATCAGCGAGACCAGTTCATACCAGTGGCACGACCAGCCTGCTGACCCCGAAATTCAACTACGAGCTTTTTAACTGCAACAACTTTAATATACGCTATTGGAGCTGGAATTACCGCGGCTGCTGGCACCAGACTTGCCCTCCAA	LR736404	AB594921.1	Uncultured mycorrhizal fungus gene for 18S ribosomal RNA, partial sequence, clone: 049	100	97.904	1.22e-161	gb|AB555662	100	97.904	1.17e-165	Glomerales	Glomeraceae	Glomus	sp.	VTX00084
OTU4	CCCAACTATCCCTATTAATCATTACGTCAATCCTAGAAACCAACAAAATAGGATCAAACGTCCTATTTCATTATTCCATGCTAATGTATTCAAGCGTTAGCCTGCTTTAAACACTCTAATTTTTTCAAAGTAACAGTCCTGTTTCCCTGCAACACCAAATTAATGACATTACAGTTCTTCAAGAAGGAGGAACCAGTAAAGCCAGTACATACCAGAGGCACGACCAACCTACTAATCCCGAAATTCAACTACGAGCTTTTTAACTGCAACAACTTTAATATACGCTATTGGAGCTGGAATTACCGCGGCTGCTGGCACCAGACTTGCCCTCCAA	LR736405	AB594863.1	Uncultured mycorrhizal fungus gene for 18S ribosomal RNA, partial sequence, clone: 0162	100	100	2.58e-173	gb|AB555656	100	100	2.47e-177	Glomerales	Glomeraceae	Glomus	sp.	VTX00080
OTU5	CCCAACTATCCCTATTAATCATTACATCGATCCTAGAAACCAACAAAATAGAATCGGATGTCCTATTTCATTATTCCATGCTAATGTATTCAAGCGTGAGCCTGCTTTAAACACTCTAATTTTTTCAAGGTAACAGTCCTAATTCCCCGTGACACCAAATTAATGGCATTACGGTTCTTTAGAAGGTGAGAAATCAATAATATCAGTACATACCAACGGCATGACCGAAACATTGATCCCGAAATTCAACTACGAGCTTTTTAACTGCAACAACTTTAATATACGCTATTGGAGCTGGAATTACCGCGGCTGCTGGCACCAGACTTGCCCTCCAA	LR736406	KM522197.1	Uncultured Glomeromycota clone S-KS4-21 18S ribosomal RNA gene, partial sequence	100	100	7.19e-174	gb|Y17635	100	100	6.89e-178	Glomerales	Glomeraceae	Glomus	caledonium	VTX00065
OTU6	CCCAACTATCCCTATTAATCATTACGGTGATCCTAGAAACCAACAAAATAGAACCATGCGTCCTATTTCATTATTCCATGCTAATGTATTCAGGCAATAGCCTGCTTTAAGCACTCTAATTTTTTCAAGGTAACAGTCCTGCTTCCCCAACGCACCAAATTAATGGCATGCTGGTTATTCAGAAGGTAGGAATCCATCACGCCAGTACAGACCCAAAAGCCCGACCAACGGATAAATCCCGAAATTCAACTACGAGCTTTTTAACTGCAACAACTTTAATATACGCTATTGGAGCTGGAATTACCGCGGCTGCTGGCACCAGACTTGCCCTCCAA	LR736407	KM600611.1	Uncultured Glomeromycota clone S-WD3-19 18S ribosomal RNA gene, partial sequence	100	99.104	7.24e-169	gb|JQ246059	100	99.104	6.94e-173	Diversisporales	Acaulosporaceae	Acaulospora	sp.	VTX00231
OTU7	CCCAACTATCCCTATTAATCATTACGTCAATCCTAGAAACCAACAAAATAGGATCAACGTCCTATTTCATTATTCCATGCTAATGTATTCAAGCGCGAGCCTGCTTTAAACACTCTAATTTTTTCAAAGTAACAGTCCTGATTCCCCACCACACCAAATTAATGACATGATGGTTCGTCAGAAGGTAGAAATCAGTAACACCAGTACGTACCGAAGGCACGACCAGCGTACTAATCCCGAAATTCAACTACGAGCTTTTTAACTGCAACAACTTTAATATACGCTATTGGAGCTGGAATTACCGCGGCTGCTGGCACCAGACTTGCCCTCCAA	LR736408	KM600603.1	Uncultured Glomeromycota clone S-WD3-10 18S ribosomal RNA gene, partial sequence	100	100	9.24e-173	gb|GU353719	100	99.099	8.92e-172	Glomerales	Glomeraceae	Glomus	LES15	VTX00219
OTU8	CCCAACTATCCCTATTAATCATTACGGTGATCCTAGAAACCAACGAAATAGAATCAGTCCGTCCTATTTCATTATTCCATGCTAATGTATTCAGACGATAGTCTGCTTTAAACACTCTAATTTTTTCAAAGTAACAGTCCTGATTTCCCATCACACCAAATAAATGGCATGAAAGTTCCTCAGAAGGTAGAGATCCATCTCACCAGTGCAGACAATTAAGCCTGACCAATGGGTAGACCCCGAAGTTCAACTACGAGCTTTTTAACTGCAACAACTTTAATATACGCTATTGGAGCTGGAATTACCGCGGCTGCTGGCACCAGACTTGCCCTCCAA	LR736409	KM522168.1	Uncultured Glomeromycota clone S-KS3-34 18S ribosomal RNA gene, partial sequence	100	100	2.01e-174	gb|HQ657105	100	100	1.92e-178	Diversisporales	Diversisporaceae	Diversispora	Diversispora1	VTX00062
OTU9	CCCAACTATCCCTATTAATCATTACGTCGATCCTAGAAACCAACAAAATAGAATCAAACGTCCTATTTCGTTATTCCATGCTAATGTATTCAAGCGTGAGCCTGCTTTAAACACTCTAATTTTTTCAAAGTAACAGTCCTGATTCCCCATGACACCAAATTAATGACATCATGGTTCGTCAGAAGGTAGGAATCAATAATACCAGTACGTACAATAGCACGACCAATAAATTGATCCCGAAATTCAACTACGAGCTTTTTAACTGCAACAACTTTAATATACGCTATTGGAGCTGGAATTACCGCGGCTGCTGGCACCAGACTTGCCCTCCAA	LR736410	KM522345.1	Uncultured Glomeromycota clone R-KS2-46d 18S ribosomal RNA gene, partial sequence	100	100	9.24e-173	gb|JX999400	100	100	8.85e-177	Glomerales	Glomeraceae	Glomus	Shi14a Phy-6	VTX00130
OTU10	CCCAACTATCCCTATTAATCATTACGGTGGTCCTAGAAACCAACAAAATAGAACCATGCCGTCCTATTTTATTATTCCATGCTAATGTATTCAAGCAAAAATGCCTGCTTTAAACACTCTAATTTTTTCAAAGTAAAGGTCCTGGTTCCCCGCGGCATCCAATTAAGGACATCGCGGTTCTCCAGAAGGTGAGAAATTGACTGCACCAGTTCATACCCCGTGAGGCACGACCGATGCGCCAATCCCGAAATTCAACTACGAGCTTTTTAACTGCAACAACTTTAATATACGCTATTGGAGCTGGAATTACCGCGGCTGCTGGCACCAGACTTGCCCTCCAA	LR736411	KM220440.1	Uncultured Claroideoglomeraceae clone gra-207 18S ribosomal RNA gene, partial sequence	100	100	3.39e-177	gb|FN869808	100	100	0	Glomerales	Claroideoglomeraceae	Claroideoglomus	Glo G8	VTX00057
OTU11	CCCAACTATCCCTATTAATCATTACGTCGATCCTAGAAACCAACAAAATAGGTTCGATCGTCCTATTTCGTTATTCCATGCTAATGTATTCAAGCGCGAGCCTGCTTTAAGCACTCTAATTTTTTCAAAGTAACAGTCCTGTTTCCCCGCAACAACAAATTAATGCCATCACGGTTCTACAAGAAGGAGGGACCAGTGAGGCCAGTGCATACCAGTGGCACGACCAACCTACTGGCCCCGAAATTCAACTACGAGCTTTTTAACTGCAACAACTTTAATATACGCTATTGGAGCTGGAATTACCGCGGCTGCTGGCACCAGACTTGCCCTCCAA	LR736412	AB594865.1	Uncultured mycorrhizal fungus gene for 18S ribosomal RNA, partial sequence, clone: 0164	100	99.701	1.2e-171	gb|JQ246031	100	99.401	5.35e-174	Glomerales	Glomeraceae	Glomus	sp.	VTX00070
OTU12	CCCAACTATCCCTATTAATCATTACGTCGATCCTAGAAACCAACAAAATAGAATCAAACGTCCTATTTCATTATTCCATGCTAATGTATTCAAGCGTGAGCCTGCTTTAAACACTCTAATTTTTTCAAAGTAACAGTCCTGATTCCCCACAACACCAAATAAATGACATCATGGTTCGTCAGAAGGGAGAAACCAACAATGCCAGTACGTACCTAGGCACGACCGACATGATGGTCCCGAAATTCAACTACGAGCTTTTTAACTGCAGCAACTTTAATATACGCTATTGGAGCTGGAATTACCGCGGCTGCTGGCACCAGACTTGCCCTCCAA	LR736413	EU417640.1	Uncultured Glomus from Sciaphila ledermannii VM26 clone a 18S ribosomal RNA gene, partial sequence	100	100	9.24e-173	gb|EU417640	100	100	8.85e-177	Glomerales	Glomeraceae	Glomus	Sciaphila ledermannii symbiont	VTX00166
OTU13	CCCAACTATCCCTATTAATCATTACGTCGATCCTAGAAACCAACAAAATAGAATCAAACGTCCTATTTCATTATTCCATGCTAATGTATTCAAGCGTAAGCCTGCTTTAAACACTCTAATTTTTTCAAAGTAACAGTCCTGATTCCCCACGACACCAAATTAATGACATCGCGGTTCTTCAGAAGGTAGGAACCAATAATGCCAGTGCGTACCGAAGCACGACCAACAATTTGATCCCGAAATTCAACTACGAGCTTTTTAACTGCAACAACTTTAATATACGCTATTGGAGCTGGAATTACCGCGGCTGCTGGCACCAGACTTGCCCTCCAA	LR736414	KM602976.1	Uncultured Glomeromycota clone S-TF2-84 18S ribosomal RNA gene, partial sequence	100	100	9.24e-173	gb|HQ323620	100	100	8.85e-177	Glomerales	Glomeraceae	Glomus	sp.	VTX00143
OTU14	CCCAACTATCCCTATTAATCATTACGTCAATCCTAGAAACCAACAAAATAGGATCGAACGTCCTATTTCATTATTCCATGCTAATGTATTCAAGCGTTAGCCTGCTTTAAACACTCTAATTTTTTCAAAGTAACAGTCCTGTTTCCCTGCAACACCAAATTAATGACATTACAGTTCTTCAGAAAGGAGGAATCAGCGAAGCCAGTGCATACCAGTGGCACGACCAACCTGCTGACCCCGAAATTCAACTACGAGCTTTTTAACTGCAACAACTTTAATATACGCTATTGGAGCTGGAATTACCGCGGCTGCTGGCACCAGACTTGCCCTCCAA	LR736415	KM600153.1	Uncultured Glomeromycota clone S-WB1-10 18S ribosomal RNA gene, partial sequence	100	100	2.58e-173	gb|AB555671	100	99.401	5.35e-174	Glomerales	Glomeraceae	Glomus	sp.	VTX00084
OTU15	CCCAACTATCCCTATTAATCATTACGGTGATCCTAGAAACCAACAAAATAGAACCATGCCGTCCTATTCTATTATTCCATGCTAATGTATTCGAGCAAAAATGCCTGCTTTAAACACTCTAATTTTTTCAAGGTAAAGGTCCTGGATCCGCAAGACACCCAATTAAGGACATCAAGTTTCTCCAGAAGGTGAGAAATCAACAGCGACAGTTCATACCCCTTAAGGCATGACCATCACGTCAATCCCGAAATTCAACTACGAGCTTTTTAACTGCAACAACTTTAATATACGCTATTGGAGCTGGAATTACCGCGGCTGCTGGCACCAGACTTGCCCTCCAA	LR736416	KM601161.1	Uncultured Glomeromycota clone R-TA1b-30 18S ribosomal RNA gene, partial sequence	100	99.707	1.58e-175	gb|HE615004	100	99.413	7.02e-178	Glomerales	Claroideoglomeraceae	Claroideoglomus	Torrecillas12b Glo G3	VTX00056
OTU16	CCCAACTATCCCTATTAATCATTACGGTGATCCTAGAAACCAACAAAATAGAACCATGCCGTCCTATTTTATTATTCCATGCTAATCTATTCAAGCACTAGCCTGCTTTAAGCACTCTAATTTTTTCAAGGTAATAGCTCTGCTTCCCCGGCGCACCAACTGAATGGCATACCGGTTATTCAGAAGGTAGGAACCCATCACCCCAGTACGGACCGTAAAGCCCGACCGACGGACAGACCCCGAAATTCAACTACGAGCTTTTTAACTGCAACAACTTTAATATACGCTATTGGAGCTGGAATTACCGCGGCTGCTGGCACCAGACTTGCCCTCCAA	LR736417	KM602077.1	Uncultured Glomeromycota clone S-TA1-32 18S ribosomal RNA gene, partial sequence	100	100	2.01e-174	gb|KF386340	100	97.917	9.07e-167	Diversisporales	Acaulosporaceae	Acaulospora	sp.	VTX00026
OTU17	CCCAACTATCCCTATTAATCATTACGGTGATCCTAGAAACCAACGAAATAGAACCAAGCCGTCCTATTTCATTATTCCATGCTAATATATTCAGACGTTAGCCTGCTTTAAACACTCTAATTTTTTCAAAGTAATAGTCCTGATTTCCAATCACACCAAATAAATGGCATGAAAGTTCCTCAGAAGGTAGAGATTTATCTCACCAGTACAGACAATTAAGCCTGACCAATGGGTAAACCCCGAAGTTCAACTACGAGCTTTTTAACTGCAACAACTTTAATATACGCTATTGGAGCTGGAATTACCGCGGCTGCTGGCACCAGACTTGCCCTCCAA	LR736418	KM522217.1	Uncultured Glomeromycota clone S-KS4-41 18S ribosomal RNA gene, partial sequence	100	100	2.01e-174	gb|FR686956	100	100	1.92e-178	Diversisporales	Diversisporaceae	Diversispora	trimurales	VTX00347
OTU18	CCCAACTATCCCTATTAATCATTACGTCAATCCTAGAAACCAACAAAATAGGATCGAACGTCCTATTTCATTATTCCATGCTAATGTATTCAAGCGTTAGCTTGCTTTAAACACTCTAATTTTTTCAAAGTAACAGTCCAAATTCCCCGCAACACCAAATTAATGGCATTACGGATCATCAGGAAGGAGGAATCAGTGAGACCAGTACATACCAGAGGCATGACCAATCTACTAACCCCGAAATTCAACTACGAGCTTTTTAACTGCAACAACTTTAATATACGCTATTGGAGCTGGAATTACCGCGGCTGCTGGCACCAGACTTGCCCTCCAA	LR736419	KM220517.1	Uncultured Glomeraceae clone gra-284 18S ribosomal RNA gene, partial sequence	100	99.401	5.58e-170	gb|KF386289	100	99.401	5.35e-174	Glomerales	Glomeraceae	Glomus	sp.	VTX00113
OTU19	CCCAACTATCCCTATTAATCATTACGTCAATCCTAGAAACCAACAAAATAGGTTCGAACGTCCTATTTCATTATTCCATGCTAATGTATTCAGGCGCTGGCCTGCTTTAAACACTCTAATTTTTTCAAAGTAACAGTCCTGTTTCCCCGCAACACCAAATTAATGGCATTACGGTTCTACAAGAAGGAGGAATCAGCAAGCTAGTACATACCAGTGGCAAGACCAACCTGCTGATCCCGAAATTCAACTACGAGCTTTTTAACTGCAACAACTTTAATATACGCTATTGGAGCTGGAATTACCGCGGCTGCTGGCACCAGACTTGCCCTCCAA	LR736420	AB909095.1	Uncultured Glomeromycota gene for 18S ribosomal RNA, partial sequence, clone: TA03-03-07	100	99.7	4.3e-171	gb|AB555664	100	99.7	4.12e-175	Glomerales	Glomeraceae	Glomus	sp.	VTX00291
OTU20	CCCAACTATCCCTATTAATCATTACGTTGATCCTAGAAACCAACAAAATAGAATCGAACGTCCTATTTCATTATTCCATGCTAATGTATTCAAGCGCGTGCCTGCTTTAAACACTCTAATTTTTTCAAAGTAACAGTCCTGATTCCCCACGACACCAAATTAATGACATCATGGCTCCTCAGAAAGGAGAAACCAATAACACCAGTACATACCAGAGGCATGACCGACGTATTGATCCCGAAATTCAACTACGAGCTTTTTAACTGCAACAACTTTAATATACGCTATTGGAGCTGGAATTACCGCGGCTGCTGGCACCAGACTTGCCCTCCAA	LR736421	AB909078.1	Uncultured Glomeromycota gene for 18S ribosomal RNA, partial sequence, clone: SH03-04-05	100	99.401	5.58e-170	gb|HM440261	100	97.006	1.17e-160	Glomerales	Glomeraceae	Glomus	sp.	VTX00178
OTU21	CCCAACTATCCCTATTAATCATTACGGTGATTCAGAAACCAACAAAACAGGACCACCGTCCTATTTTATTATTCCATGCTAATGTATTCAGACATAAGCCTGCTTTGAACACTCTAATTTTTTCAAGGTAAAGGTCCTGGTTTCCTACCACGCTAAATTAATAACATGATAGTTCCCCAGAAGGTAGAAATTCTACACGCCAGTACAGACAATAGCCCGACCAACGATAGAACCCCGAAATTCAACTACGAGCTTTTTAACTGCAACAACTTTAATATACGCTATTGGAGCTGGAATTACCGCGGCTGCTGGCACCAGACTTGCCCTCCAA	LR736422	KP227194.1	Uncultured Glomeromycota clone 332 18S ribosomal RNA gene, partial sequence	100	99.698	5.52e-170	gb|GU353459	100	99.698	5.29e-174	Diversisporales	Gigasporaceae	Scutellospora	LER04	VTX00255
OTU22	CCCAACTATCCCTATTAATCATTACGTCGATCCTAGAAACCAACAAAATAGAATCAAACGTCCTATTTCATTATTCCACGCTAATGTATTCAAGCGTGCGCCTACTTTAAACACTCTAATTTTTTCAAAGTAACAGTCCTGATTCCCCACGACACCAAATTAATGACATCGTGGTTCTTCAGAAGGTAGGAACCAATAATGCCAGTGCGTACCGAAGCATGACCGACAATTTGATCCCGAAATTCAACTACGAACTTTTTAACTGCAACAACTTTAATATACGCTATTAGAGCTGGAATTACCGCAGCTGCTGGCACCAGACTTGCCCTCCAA	LR736423	KM600866.1	Uncultured Glomeromycota clone R-BC1b-32 18S ribosomal RNA gene, partial sequence	100	97.598	2.03e-159	gb|JN559793	100	97.297	9.04e-162	Glomerales	Glomeraceae	Glomus	sp.	VTX00143
OTU23	CCCAACTATCCCTATTAATCATTACGGTGGTCCTAGAAACCAACAAAATAGAACCACAACGTCCTATTCTATTATTCCATGCTAATCTATTCAAGCAATAGCCCGCTTTAAACACTCTAATTTTTTCAAGGTAATGGTCCTGGCTCCCCAACACACCCAATTAAGGACATACTGGTTCACCAGAAGGAAGACCCGACAACAGGACAGTACTCGCCAAAGACGGACCGCCCGGCCAAGTCTAAAATTCAACTACGAGCTTTTTAACTGCAACAACTTTAATATACGCTATTGGAGCTGGAATTACCGCGGCTGCTGGCACCAGACTTGCCCTCCAA	LR736424	KC708366.1	Uncultured Glomeromycota clone 4 18S ribosomal RNA gene, partial sequence	100	99.701	3.35e-172	gb|KC708366	100	99.701	3.21e-176	Archaeosporales	Archaeosporaceae	Archaeospora	sp.	VTX00005
OTU24	CCCAACTATCCCTATTAATCATTACGTCGATCCTAGAAACCAACAAAATAGAATCAAACGTCCTATTTCATTATTCCATGCTAATGTATTCAAGCGCGAGCTTGCTTTAAACACTCTAATTTTTTCAAAGTAACAGTCCTGATTTCCCATGACACCAAATTAATGACATCGTGGTTCGTCAGAAGGGAGAAACCAATAATGCTAGTACGTACAAAGTACGACCGACATATTAGTCCCGAAATTCAACTACGAGCTTTTTAACTGCAACAACTTTAATATACGCTATTGGAGCTGGAATTACCGCGGCTGCTGGCACCAGACTTGCCCTCCAA	LR736425	KM601375.1	Uncultured Glomeromycota clone R-TB2b-26 18S ribosomal RNA gene, partial sequence	100	100	3.31e-172	gb|KF467285	100	99.699	1.48e-174	Glomerales	Glomeraceae	Glomus	Shi14b Glo-14	VTX00177
OTU25	CCCAACTATCCCTATTAATCATTACGGTGATCCTAGAAACCAACAAAATAGAATCATGCCGTCCTATTTTATTATTCCATGCTAATGTATTCAAGCAAAATGCCTGCTTTAAACACTCTAATTTTTTCAAAGTAAAGGTCCTGGTTCCCCGCGACACCCAATTAAGGGCATCGCGGTTCTCCAGAAGGTGAGAAATTGACTACACCAGTTCATACCCCTTAAGGCACGACCGATGTGTCAATCCCGAAATTCAACTACGAGCTTTTTAACTGCAACAACTTTAATATACGCTATTGGAGCTGGAATTACCGCGGCTGCTGGCACCAGACTTGCCCTCCAA	LR736426	KM602069.1	Uncultured Glomeromycota clone S-TA1-23 18S ribosomal RNA gene, partial sequence	100	100	1.21e-176	gb|U96144	100	100	1.16e-180	Glomerales	Claroideoglomeraceae	Claroideoglomus	sp.	VTX00193
OTU26	CCCAACTATCCCTATTAATCATTACAATGGTCCTAGAAACCAACAAAATAGAATCATTGTCCTATTCTATTATTCCATGCTAATGTATTCCGGCATAAGCCTGCTTTAAACACTCTAATTTTTTCAAGGTAAAGGTCTTGACTCTTCGCAACACCCACTAAAGGGCATTACGCTTCATCAAGCGGTGAGGCCCAACCGACCAGTACTCGTTACAAGAACGGACCAATCGGCCAAACCCAAAATTCAACTACGAGCTTTTTAACTGCAACAACTTTAATATACGCTATTGGAGCTGGAATTACCGCGGCTGCTGGCACCAGACTTGCCCTCCAA	LR736427	HG004479.1	Uncultured Archaeospora partial 18S rRNA gene, clone SSA-31	100	96.697	2.04e-154	gb|HG004479	100	96.697	1.96e-158	Archaeosporales	Archaeosporaceae	Archaeospora	Torrecillas 13 Arc1	VTX00338
OTU27	CCCAACTATCCCTATTAATCATTACGTTGATCCTAGAAACCAACAAAATAGAATCGAACGTCCTATTTCATTATTCCATGCTAATGTATTCAAGCGCGTGCCTGCTTTAAACACTCTAATTTTTTCAAAGTAACAGTCCTGACTCCCCACAACATCAAATTAATGACATCATGATTCATCAGAAGGGAGAAATCAATGACATTAGTACGTACCGAAGGCACGACCGACGTATTGATCCCGAAATTCAACTACGAGCTTTTTAACTGCAACAACTTTAATATACGCTATTGGAGCTGGAATTACCGCGGCTGCTGGCACCAGACTTGCCCTCCAA	LR736428	KM599861.1	Uncultured Glomeromycota clone R-WE1b-20 18S ribosomal RNA gene, partial sequence	100	98.503	2.02e-164	gb|JQ246045	100	97.605	5.42e-164	Glomerales	Glomeraceae	Glomus	sp.	VTX00178
OTU28	CCCAACTATCCCTATTAATCATTACGTCGATCCTAGAAACCAACAAAATAGGATTAACGTCCTATTTCATTATTCCATGCTAATGTATTCAAGCGTTAGCCTGCTTTAAACACTCTAATTTTTTCAAAGTAACAGTCCTGATTTCCCGCAACACCAAATTAATGACATCACGGTTCGTCAAGAAGGAGGAATCAGTAAAGCCAGTACATACCGAAGGCATGACCAACTTACTAACCCCGAAATTCAACTACGAGCTTTTTAACTGCAACAACTTTAATATACGCTATTGGAGCTGGAATTACCGCGGCTGCTGGCACCAGACTTGCCCTCCAA	LR736429	JN252466.1	Uncultured Glomeraceae clone Late-4 18S ribosomal RNA gene, partial sequence	100	100	9.24e-173	gb|JN252466	100	100	8.85e-177	Glomerales	Glomeraceae	Glomus	Late-4	VTX00088
OTU29	CCCAACTATCCCTATTAATCATTACAACAGTCCTAGAAACCAACAAATAGAACCATTGTCCTATTCCATTATTCCATGCTAATGTATTCAAGCGTATGCCTGCTTTGAACACTCTAATTTTTTCACAGTAAAAGTCCTGGTTCCCCGTCACGACCCGTAAAGGCCATGCCGCTTCGCCAGAAGGTAAAGCCCGACCACAGACAGTGCTCACCCAGAAGGCGGACCGTCCAGCCAGGCCTGAAGTTCAACTACGAGCTTTTTAACTGCAACAACTTTAATATACGCTATTGGAGCTGGAATTACCGCGGCTGCTGGCACCAGACTTGCCCTCCAA	LR736430	HE576912.1	Uncultured Paraglomus partial 18S rRNA gene, clone S1-12	100	98.806	1.21e-166	gb|HE576912	100	98.806	1.16e-170	Paraglomerales	Paraglomeraceae	Paraglomus	Alguacil12b PARA1	VTX00350
OTU30	CCCAACTATCCCTATTAATCATTACGTCGATCCTAGAAACCAACAAAATAGGGTCAAACGTCCTATTTCATTATTCCATGCTAATGTATTCAAGCGTGAGCCTGCTTTAAACACTCTAATTTTTTCAAAGTAACAGTCCTGATTCCCCGCGACACCAAATTAATGACATCACGGATCTTCAGAAGGGAGAAACCAGTGACACCAGTGCATACCAAAGGCATGACCAGCGTACTGATCCCGAAATTCAACTACGAGCTTTTTAACTGCAACAACTTTAATATACGCTATTGGAGCTGGAATTACCGCGGCTGCTGGCACCAGACTTGCCCTCCAA	LR736431	KM601415.1	Uncultured Glomeromycota clone R-TB3b-20 18S ribosomal RNA gene, partial sequence	100	100	2.58e-173	gb|KF467273	100	100	2.47e-177	Glomerales	Glomeraceae	Glomus	Shi14b Glo-3	VTX00212
OTU31	CCCAACTATCCCTATTAATCATTACATCGATCCTAGAAACCAACAAAATAGAATCTGATGTCCTATTTCATTATTCCATGCTAATGTATTCAAGCGTAAGCTTGCTTTAAACACTCTAATTTTTTCAAGGTAACAGTCCTAATTCCCCATAACATCAAATAAATGACATTATGGTTCTTTAGAAGGTGAGAACCAATAAAACCAGTACATACCAAGGCATGACCGATTCCTTGATCCCGAAATTCAACTACGAGCTTTTTAACTGCAACAACTTTAATATACGCTATTGGAGCTGGAATTACCGCGGCTGCTGGCACCAGACTTGCCCTCCAA	LR736432	KM220280.1	Uncultured Glomeraceae clone gra-47 18S ribosomal RNA gene, partial sequence	100	100	9.24e-173	gb|KF467266	100	100	8.85e-177	Glomerales	Glomeraceae	Glomus	Shi14b Glo-13	VTX00064
OTU32	CCCAACTATCCCTATTAATCATTACGTTGATCCTAGAAACCAACAAAATAGGTTCGAACGTCCTATTTCATTATTCCATGCTAATGTATTCAAGCTAAAGCCTGCTTTAAACACTCTAATTTTTTCAAAGTAACAGTCCTAACTCCCCATAACACCAAATTAATGACATCATGGTTCGTCAGAAAGGAGAGACCAATGATACCAGTACGTACCGAAGGCACGACCGACATATTGATCCCGAAATTCAACTACGAGCTTTTTAACTGCAACAACTTTAATATACGCTATTGGAGCTGGAATTACCGCGGCTGCTGGCACCAGACTTGCCCTCCAA	LR736433	AB909076.1	Uncultured Glomeromycota gene for 18S ribosomal RNA, partial sequence, clone: SH03-03-07	100	100	2.58e-173	gb|KC708342	100	100	2.47e-177	Glomerales	Glomeraceae	Glomus	Desiro13a MIB 8840	VTX00199
OTU33	CCCAACTATCCCTATTAATCATTACAACGGTCCTAGAAACCAACAAAATAGAATCGTTGTCCTATTCTATTATTCCATGCTAATGTATTCTGGCATATGCCTGCTTTAAACACTCTAATTTTTTCAAGGTAAAGGTCTTGGCTCCGAGCAACACCCAATAAAGGGCATTACCCTTCCCCAAGCGGTGAGGCCCAACCGACCAGTACTCGTTACAAGAACGGACCAATCGGCCAAACCCAAAATTCAACTACGAGCTTTTTAACTGCAACAACTTTAATATACGCTATTGGAGCTGGAATTACCGCGGCTGCTGGCACCAGACTTGCCCTCCAA	LR736434	FN869852.1	Uncultured Archaeospora partial 18S rRNA gene, clone La-26a	100	99.7	4.3e-171	gb|FN869852	100	99.7	4.12e-175	Archaeosporales	Archaeosporaceae	Archaeospora	Aca	VTX00338
OTU34	CCCAACTATCCCTATTAATCATTACGGTGGTCCTAGAAACCAACAAAATAGAACCACAACGTCCTATTCTATTATTCCATGCTAATCTATTCAAGCAAATGCCTGCTTTAAACACTCTAATTTTTTCAAGGTAATGGTCCTGGCTCCCCGGCACACCCAATAAAGGACATACTGGTTCACCAGAAGGTGGACCCGACACAGGACAGTACTCGCCAAAGACGGACCGCCCGGCCAGGCCTAAAATTCAACTACGAGCTTTTTAACTGCAACAACTTTAATATACGCTATTGGAGCTGGAATTACCGCGGCTGCTGGCACCAGACTTGCCCTCCAA	LR736435	KJ883436.1	Uncultured Glomeromycota clone RET88 18S ribosomal RNA gene, partial sequence	100	100	2.58e-173	gb|KF467320	100	100	2.47e-177	Archaeosporales	Archaeosporaceae	Archaeospora	Shi14b Amb-28	VTX00005
OTU35	CCCAACTATCCCTATTAATCATTACGGTGGTCCTAGAAACCAACAAAATAGAACCACAACGTCCTATTCTATTATTCCATACTAATCTATTCAAGCAATAGCCCGCTTTAAACACTCTAATTTTTTCAAGGTAATAGTTCTGGCTCCCCAAAACACCCAATAAAGGGCATACTGGTTCACCAGAAGGAAGACCCGACAGCAGACAGTACTCGCCAAAGACGGACCGCCCGGCCAGGCCTAAAATTCAACTACGAGCTTTTTAACTGCAACAACTTTAATATACGCTATTGGAGCTAGAATTACCGCGGCTGCTGGCACCAGACTTGCCCTCCAA	LR736436	AB746991.1	Uncultured Glomeromycota gene for 18S ribosomal RNA, partial sequence, clone: Pl_Yu_3_2_3	100	98.503	5.62e-165	gb|KC708346	100	98.204	2.5e-167	Archaeosporales	Archaeosporaceae	Archaeospora	Desiro13a MIB 8531	VTX00005
OTU36	CCCAACTATCCCTATTAATCATTACGTCGATCCTAGAAACCAACAAAATAGGGTCAAACGTCCTATTTCATTATTCCATGCTAATGTATTCAAGCGTGTGCCTGCTTTAAACACTCTAATTTTTTCAAAGTAACGGTCCTGATTCCCCATGACACCAAATTAATGACATCACAGTTCGTCAGAAGGTAGAAATCAATAATACCAGTGCATACCAGAGGCACGACCAATATATTGATCCCGAAATTCAACTACGAGCTTTTTAACTGCAACAACTTTAATATACGCTATTGGAGCTGGAATTACCGCGGCTGCTGGCACCAGACTTGCCCTCCAA	LR736437	KM600204.1	Uncultured Glomeromycota clone S-WB1-70 18S ribosomal RNA gene, partial sequence	100	99.701	1.2e-171	gb|DQ336490	100	97.605	5.42e-164	Glomerales	Glomeraceae	Glomus	Kottke08-17	VTX00124
OTU37	CCCAACTATCCCTATTAATCATTACATCGATCCTAGAAACCAACAAAATAGAATTGGATGTCCTATTTTATTATTCTATGCTAATGTATTCAAGCGTGAGCCTGCTTTAAACACTCTAATTTTTACAAAGTAACAGTCCTAATTCCCCGTGACACCAAATTAATGGCATTACGGTTCTTTAAAAGATGAGAAATTAATAATATCAGTACATACCAACGGCATGACCAAAACATTGATTTCGAAATTCAACTACGAGCTTTTTAACTGCAACAACTTTAATATACGCTATTGGAGCTAGAATTACTGTGGCTGCTAGCACCAGACTTGCCCTCCAA	LR736438	HQ656898.1	Uncultured Glomeromycota clone Zephyr_KRI_D3_6 small subunit ribosomal RNA gene, partial sequence	100	95.821	1.6e-150	gb|Y17635	100	95.522	7.14e-153	Glomerales	Glomeraceae	Glomus	caledonium	VTX00065
OTU38	CCCAACTATCCCTATTAATCATTACAACGGTCCTAGAAACCAACAAAATAGAATCATTGTCCTATTCTATTATTCCATGCTAATGTATTCCGGCATATGCCTGCTTTAAACACTCTAATTTTTTCAAGGTAAAGGTCTTGGATATTCGCAACATCCAATAAAGGACATTACGCTTCCCCAAGCGGTGAGGCCCAACCGACCAGTACTCGTTACAAGAACGGACCAATCGGCCAAACCCAAAATTCAACTACGAGCTTTTTAACTGCAACAACTTTAATATACGCTATTGGAGCTGGAATTACCGCGGCTGCTGGCACCAGACTTGCCCTCCAA	LR736439	FN869852.1	Uncultured Archaeospora partial 18S rRNA gene, clone La-26a	100	97.297	9.44e-158	gb|FN869852	100	97.297	9.04e-162	Archaeosporales	Archaeosporaceae	Archaeospora	Aca	VTX00338
OTU39	CCCAACTATCCCTATTAATCATTACGGTGATCCTAGAAACCAACAAAATAGAACCATGCCGTCCTATTTTATTATTCCATGCTAATGTATTCAGGCACTAGCCTGCTTTGAGCACTCTAATTTTTTCAAGGTAATAGTCCTGCTTCCCCAACGCACCAAATGAATGGCATGCTGGTTATTCAGAAGGTAAGAACCCACCACACCAGTACGGACAGTGAAGCCCGACCGATGGACAGATTCCGAAATTCAACTACGAGCTTTTTAACTGCAACAACTTTAATATACGCTATTGGAGCTGGAATTACCGCGGCTGCTGGCACCAGACTTGCCCTCCAA	LR736440	KM599424.1	Uncultured Glomeromycota clone R-WB1b-23 18S ribosomal RNA gene, partial sequence	100	99.702	9.33e-173	gb|JQ246061	100	99.702	8.94e-177	Diversisporales	Acaulosporaceae	Acaulospora	sp.	VTX00024
OTU40	CCCAACTATCCCTATTAATCATTACGTCAATCCTAGAAACCAACAAAATAGGATCGTCGTCCTATTTCATTATTCCATGCTAATGTATTCAAGCGTTAGCCTGCTTTAAACACTCTAATTTTTTCAAAGTAACAGTCCTGTTTCCCCGCAACACCAACTTAATGGCATTACGGTTCTACAAGAAGGAGGAATCAGCAAAGCCAGTGCATACCAGTGGCACGACCAACTTGCTGACCCCGAAATTCAACTACGAGCTTTTTAACTGCAACAACTTTAATATACGCTATTGGAGCTGGAATTACCGCGGCTGCTGGCACCAGACTTGCCCTCCAA	LR736441	KM599405.1	Uncultured Glomeromycota clone R-WB1b-1 18S ribosomal RNA gene, partial sequence	100	100	9.24e-173	gb|JQ246055	100	98.503	1.93e-168	Glomerales	Glomeraceae	Glomus	sp.	VTX00126
OTU41	CCCAACTATCCCTATTAATCATTACAACGGTCCTAGAAACCAACAAATAGAACCATTGTCCTATTCCATTATTCCATGCTAATGTATCCAAGCGATTGCCTGCTTTGAACACTCTAATTTTTTCACAGTAAAAGTCCTGGTTCCCCGCCACGGCCGGTTAAGGCCATGACGCTTCGCCAGAAGGTAGGACCCGACCACAGACAGTACTCACCCGAAGGGCGGACCGTCCAGCCAGGCCTGAAATTCAACTACGAGCTTTTTAACTGCAACAACTTTAATATACGCTATTGGAGCTGGAATTACCGCGGCTGCTGGCACCAGACTTGCCCTCCAA	LR736442	KM114355.1	Glomeromycota sp. AB-2014 isolate OTU09_IScS 18S ribosomal RNA gene, partial sequence	100	100	2.58e-173	gb|HQ657116	100	100	2.47e-177	Paraglomerales	Paraglomeraceae	Paraglomus	Paraglomus1	VTX00281
OTU42	CCCAACTATCCCTATTAATCATTACGGTGATCCTAGAAACCAACAAAATAGAACCATGCCGTCCTATTTTATTATTCCATGCTAATCTATTCAAGCACTAGCTTGCTTTAAGCACTCTAATTTTTTCAAGGTAATAGCTCTGCTTCCCCAACGCACCAAATTAATGGCATGAAGGTTATTCAGAAGGTAAGAATCCATCAAATCAGTACGAACAGTGAAGCCCGACCGATAGACAGATTCCGAAATTCAACTACGAGCTTTTTAACTGCAACAACTTTAATATACGCTATTGGAGCTGGAATTACCGCGGCTGCTGGCACCAGACTTGCCCTCCAA	LR736443	KC182583.1	Uncultured Acaulospora clone V4-7I3 18S ribosomal RNA gene, partial sequence	100	97.917	9.46e-163	gb|KF879051	100	97.619	4.22e-165	Diversisporales	Acaulosporaceae	Acaulospora	Deepika15 Acaulo P1	VTX00424
OTU43	CCCAACTATCCCTATTAATCATTACGTCGATCCTAGAAACCAACAAAATAAGATCAAACGTCCTATTTCATTATTCCATGCTAATGTATTCAAGCGTGTGCCTGCTTTAAACACTCTAATTTTTTCAAAGTAACAGTCCTGATTCCCCATAACACCAAATTAATGACATCATAGTTCGTCAGAAGGGAGAAATCAATAATACCAGTACATACCGAAGTACGACCGATATATTGATCCCGAAATTCAACTACGAGCTTTTTAACTGCAACAACTTTAATATACGCTATTGGAGCTGGAATTACCGCGGCTGCTGGCACCAGACTTGCCCTCCAA	LR736444	DQ336523.1	Uncultured Glomus clone K173c4 18S ribosomal RNA gene, partial sequence	100	98.799	4.33e-166	gb|DQ336523	100	98.799	4.15e-170	Glomerales	Glomeraceae	Glomus	Kottke08-17	VTX00124
OTU44	CCCAACTATCCCTATTAATCATTACGTCGATCCTAGAAACCAACAAAATAAGATCAAACGTCCTATTTCATTATTCCATGCTAATGTATTCAAGCGCGAGCCTGCTTTAAACACTCTAATTTTTTCAAAGTAACAGTCCTGATTCCCCGCCACACCAAATAAATGGCATAACGGTTCTTCAGAAGGGAGGAATCAGTGACACCAGTACATACCAAAGGCACGACCAGCGTACTGATCCCGAAATTCAACTACGAGCTTTTTAACTGCAACAACTTTAATATACGCTATTGGAGCTGGAATTACCGCGGCTGCTGGCACCAGACTTGCCCTCCAA	LR736445	AM946787.1	uncultured Glomus partial 18S rRNA gene, clone 1AaC_re	100	99.701	1.2e-171	gb|AB698565	100	99.401	5.35e-174	Glomerales	Glomeraceae	Glomus	Goomaral13a Glo2	VTX00085
OTU45	CCCAACTATCCCTATTAATCATTACAACGGTCCTAGAAACCAACAAAATAGAAACGTTGTCCTATTCTATTATTCCATGCTAATGTATTCCGGCATAAGCCTGCTTTAAACACTCTAATTTTTTCAAGGTAAAGGTCTTGGCTACTCGCAACACCCAATAAAGGGCATTACGCATGACCAAGCGATGAGGCCCGACCGCCCAGTACTCGTTACAAGAACGGACCAAACGGCCGAACCCAAAATTCAACTACGAGCTTTTTAACTGCAACAACTTTAATATACGCTATTGGAGCTGGAATTACCGCGGCTGCTGGCACCAGACTTGCCCTCCAA	LR736446	FN869850.1	Uncultured Archaeospora partial 18S rRNA gene, clone Psc-16	100	96.997	4.39e-156	gb|FN869850	100	96.997	4.21e-160	Archaeosporales	Archaeosporaceae	Archaeospora	Aca	VTX00338
OTU46	CCCAACTATCCCTATTAATCATTACGTCAATCCTAGAAACCAACAAAATAGGGTCAAACGTCCTATTTCATTATTCCATGCTAATGTATTCAAGCTAATGCCTGCTTTAAACACTCTAATTTTTTCAAAGTAACAGTCCTAACTCCCCATGACACCAAATAAATGAAATCATGGTTCGTCAGAAGGGAGAAATCAATGATACCAGTACGTACCAGAGGCACGACCGATATATTGATCCCGAAATTCAACTACGAGCTTTTTAACTGCAACAACTTTAATATACGCTATTGGAGCTGGAATTACCGCGGCTGCTGGCACCAGACTTGCCCTCCAA	LR736447	AB546433.1	Uncultured Glomus gene for 18S ribosomal RNA, partial sequence, clone: C2-18	100	100	2.58e-173	gb|AB546440	100	99.701	1.15e-175	Glomerales	Glomeraceae	Glomus	sp.	VTX00194
OTU47	CCCAACTATCCCTATTAATCATTACGGTGGTCCTAGACCAACAAAATAGAACCAACGTCCTATTCTATTATTCCATGCTAATCTATTCAAGCAAAAGCCCGCTTTAAACACTCTAATTTTTTCAAGGTAATGGTCCTGGTTCCCCGACACACCCAATAAAGGGCATACCGGCTCACCAGAAGGATAGACCCGACAACAGACAGTACTCGCCAGAGACGGACCGCCCGGTCAGGTCTAAAATTCAACTACGAGCTTTTTAACTGCAACAACTTTAATATACGCTATTGGAGCTGGAATTACCGCGGCTGCTGGCACCAGACTTGCCCTCCAA	LR736448	KM114393.1	Glomeromycota sp. AB-2014 isolate OTU11_RObS 18S ribosomal RNA gene, partial sequence	100	99.096	1.2e-166	gb|AJ563887	100	98.187	1.15e-165	Archaeosporales	Archaeosporaceae	Archaeospora	Wirsel OTU21	VTX00004
OTU48	CCCAACTATCCCTATTAATCATTACGTCAATCCTAGAAACCAACAAAATAGGATCGAACGTCCTATTTCATTATTCCATGCTAATGTATTCAAGCGTTAGCCTGCTTTAAACACTCTAATTTTTTCAAAGTAACAGTCCAGTCTCCCCGCAACACCAAGTTAATGGCATTACGGTTCATCAGGAAGGAGGAATCAGTAAGACCAGTACGTACCAATGGCACGACCAATCTACTAACCCCGAAATTCAACTACGAGCTTTTTAACTGCAACAACTTTAATATACGCTATTGGAGCTGGAATTACCGCGGCTGCTGGCACCAGACTTGCCCTCCAA	LR736449	JX297018.1	Uncultured Glomeromycota clone K23_2 18S ribosomal RNA gene, partial sequence	100	99.102	2.6e-168	gb|EU417630	100	99.102	2.49e-172	Glomerales	Glomeraceae	Glomus	Afrothismia hydra symbiont	VTX00092
OTU49	CCCAACTATCCCTATTAATCATTACGGTGATCCTAGAAACCAACAAAATAGAACCATGCCGTCCTATTTTATTATTCCATGCTAATGTATTCAGGCATAGGCCTGCTTTGAGCACTCTAATTTTTTCAAGGTAATGGTTCTGCTTCCCCGGCACATCAAATTAATGGCATACCGGTTATTCAGAAGGTAGGAATCCATCACACCAGTGCGGACCGTGAGGCCCGACCGACGGATAGATCCCGAAATTCAACTACGAGCTTTTTAACTGCAACAACTTTAATATACGCTATTGGAGCTGGAATTACCGCGGCTGCTGGCACCAGACTTGCCCTCCAA	LR736450	KM599644.1	Uncultured Glomeromycota clone R-WC3-16 18S ribosomal RNA gene, partial sequence	100	100	2.01e-174	gb|JF414178	100	100	1.92e-178	Diversisporales	Acaulosporaceae	Acaulospora	sp.	VTX00328
OTU50	CCCAACTATCCCTATTAATCATTACGTCGATCTTAGAAACCAACAAAATAAGATCAAACGTCCTATTTCATTATTCCATGCTAATGTATTCAAGCGAATGCCTGCTTTAAACACTCTAATTTTTTCAAAGTAACAGTCCTGATTTCCCACGACACCAAATTAATGACATCGTGGTTCGTCAGAAGGGAGAAACCGACAGGGCCAGTACACACCAGAGGCGCGACCGACCCGTCGATCCCGAAATTCAACTACGAGCTTTTTAACTGCAACAACTTTAATATACGCTATTGGAGCTGGAATTACCGCGGCTGCTGGCACCAGACTTGCCCTCCAA	LR736451	KJ740968.1	Uncultured Glomeromycota clone 2012.PS.ZD91-1.53 18S small subunit ribosomal RNA gene, partial sequence	100	100	2.58e-173	gb|KF916655	100	100	2.47e-177	Glomerales	Glomeraceae	Glomus	Chen14 DL-Glo14	VTX00419
OTU51	CCCAACTATCCCTATTAATCATTACGTCAATCCTAGAAACCAACAAAATAGGATCAAACGTCCTATTTCATTATTCCATGCTAATGTATTCAAGCGTGTGCTTGCTTTAAACACTCTAATTTTTTCAAAGTAACAGTCCTGATTCTCCATGACACCAAATTAATGACATCACAGTTCATCAGAAGGGAGAAATCAATGATGTCAGTACATACCAAAGGCATGACCGGCACCTTGATCCCGAAATTCAACTACGAGCTTTTTAACTGCAACAACTTTAATATACGCTATTGGAGCTGGAATTACCGCGGCTGCTGGCACCAGACTTGCCCTCCAA	LR736452	KM600455.1	Uncultured Glomeromycota clone S-WC3-20 18S ribosomal RNA gene, partial sequence	100	99.401	5.58e-170	gb|LN621469	94	97.764	1.98e-153	Glomerales	Glomeraceae	Glomus	sp.	VTX00383
OTU52	CCCAACTATCCCTATTAATCATTACGGTGGTCCTTGAACCAACAAAATAGAACCACAACGTCCTATTCTATTATTCCATGCTAATCTATTCAAGCAAAAGCCTGCTTTAAACACTCTAATTTTTTCAAGGTAATGGTCCTGGCTCCCCGGCACGCCCAATTAAGAACATACCGATTCACCAGAAAGATAGACCCGACGACAGAACAGTACTCGCCAGAGACGGACCGTCCGGCCAGGCCTAAAATTCAACTACGAGCTTTTTAACTGCAACAACTTTAATATACGCTATTGGAGCTGGAATTACCGCGGCTGCTGGCACCAGACTTGCCCTCCAA	LR736453	KM599506.1	Uncultured Glomeromycota clone R-WB3b-1 18S ribosomal RNA gene, partial sequence	100	100	7.19e-174	gb|LN621347	94	99.363	2.53e-162	Archaeosporales	Archaeosporaceae	Archaeospora	sp.	VTX00004
OTU53	CCCAACTATCCCTATTAATCATTACGGTGATTCAGAAACCAACAAAACAGGACCACCGTCCTATTCTATTATTCCATGCTAATGTATTCAGACGTAAGCCTGCTTTGAACACTCTAATTTTTTCAAGGTAAAGGTCCTGGTTTCCCACCACGCTAAATTAATAACATGATAGTTCCCCAGAAGGTAGAAATTCTACACACCAGTACAGACTTGTTAGCCCGACCAACGGTAGAATCCCGAAATTCAACTACGAGCTTTTTAACTGCAACAACTTTAATATACGCTATTGGAGCTGGAATTACCGCGGCTGCTGGCACCAGACTTGCCCTCCAA	LR736454	AB909086.1	Uncultured Glomeromycota gene for 18S ribosomal RNA, partial sequence, clone: TA01-02-10	100	100	9.24e-173	gb|KF467268	100	100	8.85e-177	Diversisporales	Gigasporaceae	Scutellospora	Shi14b Scu-21	VTX00049
OTU54	CCCAACTATCCCTATTAATCATTACGTCAACCCTAGAAACCAACAAAATAGGATCAAACGTCCTATTTTATTATTCCATGCTAATGTATTCAAGCGTTAGCCTGCTTTAAACACTCTAATTTTTTCAAAGTAACAGTCCTGTTTCCCCGCAACACCAAATTAATGGCATCACGGTTCTTCAAGAAGGAGGAATCAGCGAGGCCAGTGCATACCATTGGCACGACCAACCTGCTGACCCCGAAATTCAACTACGAGCTTTTTAACTGCAACAACTTTAATATACGCTATTGGAGCTGGAATTACCGCGGCTGCTGGCACCAGACTTGCCCTCCAA	LR736455	AB546445.1	Uncultured Glomus gene for 18S ribosomal RNA, partial sequence, clone: C3-11	100	98.503	5.62e-165	gb|AB546445	100	98.503	5.38e-169	Glomerales	Glomeraceae	Glomus	sp.	VTX00359
OTU55	CCCAACTATCCCTATTAATCATTACGGTTGTCCTAGAAACCAACAAAATAAAACAACTTCGTCCTATTCTATTATTCCATGCTAATGTATTCCGGCATAAGCCTGCTTTAAACACTCTAATTTTTTCAAGGTAAAGGTCCTGACTACCCGCAACATCCAATAAAGGACATTACGTATCACCAGGCGGATAGACCCCACACAACCAGTACTCATCAAAAGATGGACCGATTGGTAGAATCCAAAATTCAACTACGAGCTTTTTAACTGCAACAACTTTAATATACGCTATTGGAGCTGGAATTACCGCGGCTGCTGGCACCAGACTTGCCCTCCAA	LR736456	AJ006800.1	Acaulospora trappei 18S rRNA gene, isolate NB112	100	99.403	4.33e-171	gb|AJ006800	100	99.403	4.15e-175	Archaeosporales	Archaeosporaceae	Archaeospora	trappei	VTX00245
OTU56	CCCAACTATCCCTATTAATCATTACGGTGATTTAGAAACCAACAAAACAGGACCACCGTCCTATTTTATTATTCCATGTTAATGTATTCAAACGTAAGCCTGCTTTGAACACTCTAATTTTTTCAAGGTAAAGGTCCTGGTTTCCCACTACGCTAAATTAATAACATGATGGTTCCCCAGAAGGTAGAAATTCCACACGCCAGTACAGACAATTGCCCGACCAGCGGTAGAACCCCGAAATTCAACTACGAGCTTTTTAACTGCAACAACTTTAATATACGCTATTGGAGCTGGAATTACCACGGCTGCTGGCACCAGACTTGCCCTCCAA	LR736457	KM600067.1	Uncultured Glomeromycota clone S-WA2-45 18S ribosomal RNA gene, partial sequence	100	98.187	1.2e-161	gb|X58726	100	98.187	1.15e-165	Diversisporales	Gigasporaceae	Gigaspora	rosea	VTX00039
OTU57	CCCAACTATCCCTATTAATCATTACGGTGATCCTAGAAACCAACAAAATAGAACCATGCCGTCCTATTTTATTATTCCATGCTAATCTATTCAAGCACAAGCCTGCTTTAAGCACTCTAATTTTTTCAAGGTAATAGCTCTGCTTCCCCAACGCACTAACTTAATAGCATGCTGGTTATTCAGAAGGTAGGAATTCATCAGGCCAGTGCGGACAGTGAAGCCCGACCAACCGACAAACTCCGAAATTCAACTACGAGCTTTTTAACTGCAACAACTTTAATATACGCTATTGGAGCTGGAATTACCGCGGCTGCTGGCACCAGACTTGCCCTCCAA	LR736458	KJ452254.1	Uncultured Acaulosporaceae clone A-C04 small subunit ribosomal RNA gene, partial sequence	100	99.702	9.33e-173	gb|EU573759	100	99.702	8.94e-177	Diversisporales	Acaulosporaceae	Acaulospora	Schechter08 Acau1	VTX00030
OTU58	CCCAACTATCCCTATTAATCATTACGGTGATCCTAGAAACCAACAAAATAGAACCAATCCGTCCTATTTCATTATTCCATGCTAATGTATTCAGACTATAGCCTGCTTTAAACACTCTAATTTTTTCAAAGTAACAGTCCTGATTTCCCAACACACCAAATTAATGACATGAAGGTTCTTCAGAAGGTAGAAATTCGCCACTACTGTACGGACCGTAAAGCCCGACCATAGGACAAATTTCGAATTTCAACTACGAGCTTTTTAACTGCAACAACTTTAATATACGCTATTGGAGCTGGAATTACCGCGGCTGCTGGCACCAGACTTGCCCTCCAA	LR736459	KM602042.1	Uncultured Glomeromycota clone R-TF3b-32 18S ribosomal RNA gene, partial sequence	100	100	2.01e-174	gb|GU238338	100	100	1.92e-178	Diversisporales	Diversisporaceae	Entrophospora	Clade-1	VTX00346
OTU59	CCCAACTATCCCTATTAATCATTACGTCGATCCTAGAAACCAACAAAATAGAATCAAACGTCCTATTTCATTATTCCATGCTAATGTATTCAAGCGCGAGCCTGCTTTAAACACTCTAATTTTTTCAAAGTAACGGTCCTGATTCCCCATGACACCAAATTAATGACATCATGGTTCTTCAGAAGGGAGAAATCAAAATTGCCAGTACGTACCGAGGCACGACCAACAAATTGATCTCGAAATTCAACTACGAGCTTTTTAACTGCAACAACTTTAATATACGCTATTGGAGCTGGAATTACCGCGGCTGCTGGCACCAGACTTGCCCTCCAA	LR736460	KM602056.1	Uncultured Glomeromycota clone S-TA1-8 18S ribosomal RNA gene, partial sequence	100	100	9.24e-173	gb|EF154346	100	100	8.85e-177	Glomerales	Glomeraceae	Glomus	sp.	VTX00165
OTU60	CCCAACTATCCCTATTAATCATTACGTTGTACCTAGAAACCAACAAAATAGGTTCGAACGTCCTATTTCATTATTCCATGCTAATGTATTCAAGCGTTTGCCTGCTTTAAACACTCTAATTTTTTCAAAGTAACAGTCCTGACTCCCCACAACACCAAATTAATGACATCATGGTTCATCAGAAGGGAGAAATCAACGACGCCAGTGCGTACCGAAGGCACGACCGACGTATTGATCCCGAAATTCAACTACGAGCTTTTTAACTGCAACAACTTTAATATACGCTATTGGAGCTGGAATTACCGCGGCTGCTGGCACCAGACTTGCCCTCCAA	LR736461	KM600166.1	Uncultured Glomeromycota clone S-WB1-27 18S ribosomal RNA gene, partial sequence	100	100	2.58e-173	gb|LN621372	94	99.042	4.22e-160	Glomerales	Glomeraceae	Glomus	sp.	VTX00368
OTU61	CCCAACTATCCCTATTAATCATTACGTCAATCCTAGAAACCAACAAAATAGGATCGCTACGTCCTATTTTATTATTCCATGCTAATGTATTCAAGCGTTAGCCTGCTTTAAACACTCTAATTTTTTCAAAGTAACAAGTCCTGATTCCCTGCAGCACCAAATAAATGGCATTACAGTTCTTCAAGAAGGAGGAATCAGTAAAGCCGGTACATACCAGTGGTACGACCAACCTACTAACCCCGAAATTCAACTACGAGCTTTTTAACTGCAACAACTTTAATATACGCTATTGGAGCTGGAATTACCGCGGCTGCTGGCACCAGACTTGCCCTCCAA	LR736462	KM600265.1	Uncultured Glomeromycota clone S-WB2-66 18S ribosomal RNA gene, partial sequence	100	100	2.01e-174	gb|LN617743	94	97.778	1.54e-154	Glomerales	Glomeraceae	Glomus	sp.	VTX00074
OTU62	CCCAACTATCCCTATTAATCATTACGTGATCCTAAAACCAACAAAATAGAACCATCGTCCTATTTTATTATTCCATGCTAATGTATTCAAGCAAAAATGCCCGCTTTAAACACTCTAATTTTTTCAAAGTAAAGGTCCTGATTCATCGAAACACCCAAGAGCATCCCGAATCACCAGAAGGTGAGAAATTGGCTACACACCGTTTCATGCCCCTAAAGGCACAATCGATATATCCCAATCCCGAAATTCAACTACGAGCTTTTTAACCGCAACAACACTAATATACGCTATTGGAGCTGGAATTACCGCGGCTGCTAATACCAGACTTGCCCTCCAA	LR736463	AB746997.1	Uncultured Glomeromycota gene for 18S ribosomal RNA, partial sequence, clone: Pl_Tg_2_2_16	100	100	5.59e-175	gb|HG004493	100	95.549	2e-153	Glomerales	Claroideoglomeraceae	Claroideoglomus	Torrecillas 13 Cl3	VTX00402
OTU63	CCCAACTATCCCTATTAATCATTACGGTGATCCTAGAAACCAACAAAATAGAATCATGCCGTCCTATTTCATTATTCCATGCTAATCTATTCAAGCATAAAGCCTGCTTTAAACACTCTAATTTTTTCAAAGTAACAGTCCTAGCTTCCTATTACACCTAATGAAAGGCATAATAGTTCACTAGAAGGTGGAGATTAACAGCTACCAGTACATGTCCGAAAACACGACCGATATGCCAATCCCGAAATTCAACTACGAGCTTTTTAACTGCAACAACTTTAATATACGCTATTGGAGCTGGAATTACCGCGGCTGCTGGCACCAGACTTGCCCTCCAA	LR736464	HG972876.1	Uncultured Glomus partial 18S rRNA gene, isolate Borracho cay, clone BO3A-11	100	95.015	9.73e-148	gb|HG004533	100	89.535	4.52e-120	Glomerales	Claroideoglomeraceae	Claroideoglomus	Torrecillas 13 Cl9	VTX00193
OTU64	CCCAACTATCCCTATTAATCATTACGGTGATTCAGAAACCAACAAAACAGGACCACTGTCCTATTTTATTATTCCATGCTAATGTATTCAGACGTAAACCTGCTTTGAACACTCTAATTTTTTCAAGGTAAAGGTCCTGGTTTCCCACCATGCTAAATTAATAACATGATGGTTCCCCAGAAGGTAGAAATTCCACACGCCAGTACAGACTATTGCCCGACCAACGGTAGAACCCCGAAATTCAACTACGAGCTTTTTAACTGCAACAACTTTAATATACGCTATTGGAGCTGGAATTACCGCGGCTGCTGGCACCAGACTTGCCCTCCAA	LR736465	KM600051.1	Uncultured Glomeromycota clone S-WA2-20 18S ribosomal RNA gene, partial sequence	100	99.094	1.2e-166	gb|X58726	100	98.792	5.33e-169	Diversisporales	Gigasporaceae	Gigaspora	rosea	VTX00039
OTU65	CCCAACTATCCCTATTAATCATTACGTCGATCCTAGAAACCAACAAAATAGAATCAAACGTCCTATTCCGTTATTCCATGCTAATGTATTCAAGCGTGAGCCTGCTTTAAACACTCTAATTTTTTCAAAGTAACAGTCCTGATTCCCTAAAACACCAAATTAATGGCATTAAAGTTCGTCAGAAAGGAGAAACCGATTATACCAGTACGTACAATAGCACGACCAGTAAGCCGGTCTCGAAATTCAACTACGAGCTTTTTAACTGCAACAACTTTAATATACGCTATTGGAGCTGGAATTACCGCGGCTGCTGGCACCAGACTTGCCCTCCAA	LR736466	KJ209988.1	Uncultured Glomus clone 171 18S ribosomal RNA, partial sequence	100	100	9.24e-173	gb|EU123442	100	99.7	4.12e-175	Glomerales	Glomeraceae	Glomus	Glom 1B.2	VTX00222
OTU66	CCCAACTATCCCTATTAATCATTACGTCGATCCTAGAAACCAACAAAATAGGGTCAAACGTCCTATTTCATTATTCCATGCTAATGTATTCAAGCGTTAGCTTGCTTTAAACACTCTAATTTTTTCAAAGTAACAGTCCTGATTCTCCACGACACCAAATTAATGACATCATGGTTCGTCAGAAGGGAGAAACCAATAAAATCAGTACGTACCAGAGGCACGACCAATTAATTGATCCCGAAATTCAACTACGAGCTTTTTAACTGCAACAACTTTAATATACGCTATTGGAGCTGGAATTACCGCGGCTGCTGGCACCAGACTTGCCCTCCAA	LR736467	KJ817391.1	Uncultured Glomeromycota clone SF-68 18S ribosomal RNA gene, partial sequence	100	100	2.58e-173	gb|KF467255	100	100	2.47e-177	Glomerales	Glomeraceae	Glomus	Shi14b Glo-7	VTX00129
OTU67	CCCAACTATCCCTATTAATCATTACGTCGATCCTAGAAACCAACGAAATAGGATCAAACGTCCTATTTCATTATTCCATGCTAATGTATTCAAGCTAATGCTTGCTTTAAACACTCTAATTTTTTCAAAGTAACAGTCCTGATTCCCCACGACACCAAATTAATGACATCATGCTTCGTCAGAAGGGAGAAACCAATTGTACCAGTTCATACCGTAGGCACGACCGATAAATTGATCCCGAAATTCAACTACGAGCTTTTTAACTGCAACAACTTTAATATACGCTATTGGAGCTGGAATTACCGCGGCTGCTGGCACCAGACTTGCCCTCCAA	LR736468	KM600338.1	Uncultured Glomeromycota clone S-WC1-11 18S ribosomal RNA gene, partial sequence	100	100	2.58e-173	gb|AB556918	100	99.701	1.15e-175	Glomerales	Glomeraceae	Glomus	sp.	VTX00122
OTU68	CCCAACTATCCCTATTAATCATTACGTCAATCCTAGAAACCAACAAAATAGAATCAAACGTCCTATTCCGTTATTCCATGCTAATGTATTCAAGCGTGAGCCTGCTTTAAACACTCTAATTTTTTCAAAGTAACAGTCCTGATTTCCCATAACACCAAATTAATGGCATTATAGTTCGTCAGAAGAGAGAAACCGATTATACCAGTACGTACAAAAGCACGACCAATAAACCGGTCTCGAAATTCAACTACGAGCTTTTTAACTGCAACAACTTTAATATACGCTATTGGAGCTGGAATTACCGCGGCTGCTGGCACCAGACTTGCCCTCCAA	LR736469	KM602148.1	Uncultured Glomeromycota clone S-TA2-62 18S ribosomal RNA gene, partial sequence	100	99.399	2e-169	gb|JF683576	100	97.898	4.18e-165	Glomerales	Glomeraceae	Glomus	sp.	VTX00222
OTU69	CCCAACTATCCCTATTAATCATTACGGTGATCCTAGAAACCAACAAAATAGAACCAAACCGTCCTATTTTATTATTCCATGCTAATGTATTCAGACGGATGCCTGCTTTAAACACTCTAATTTTTTCAAAGTAACAGTCCTGATTTCCCCCCACACCAACTGAATGACATGGAGATTCCTCAGAAGGTAGGAACTCGTCACACCAGTGCAGACAGTTAAGCCTGACCAATGGGCAAATCCCGAAGTTCAACTACGAGCTTTTTAACTGCAACAACTTTAATATACGCTATTGGAGCTGGAATTACCGCGGCTGCTGGCACCAGACTTGCCCTCCAA	LR736470	KM602881.1	Uncultured Glomeromycota clone S-TE3-111 18S ribosomal RNA gene, partial sequence	100	99.702	9.33e-173	gb|JF683570	99	99.701	3.22e-176	Diversisporales	Diversisporaceae	Diversispora	sp.	VTX00356
OTU70	CCCAACTATCCCTATTAATCATTACGGTGGTCCTAGAACCAACAAAATAGAACCAACGTCCTATTCTATTATTCCATGCTAATCTATTCAAGCAAATGCCCGCTTTAAACACTCTAATTTTTTCAAGGTAATGGTCCTGGTTCCCCGACACACCCAATAAAGGGCATCCCGGCTCACCAGAAGGATAGACCCGACGACAGAACAGTACTCACCAAAGACGGACCATCCGGTCAGGCCTAAAATTCAACTACGAGCTTTTTAACTGCAACAACTTTAATATACGCTATTGGAGCTGGAATTACCGCGGCTGCTGGCACCAGACTTGCCCTCCAA	LR736471	KC832511.1	Uncultured Glomeromycota clone D2-Glom 18S ribosomal RNA gene, partial sequence	100	99.099	9.3e-168	gb|KC832511	100	99.099	8.92e-172	Archaeosporales	Archaeosporaceae	Archaeospora	D2-Glom
OTU71	CCCAACTATCCCTATTAATCATTACAACGGTCCTAGAACCAACAAAATAGAACCATCGTCCTATTCCATTATTCCATGCTAATGTATTCGAGCATATTTGCCTGCTTTGAACACTCTAATTTTTTCACAGTAAAAGTCCTGGTTCCCCGACACAACCAATTAAGGCCATGCCGCTTCGCCAGAAGGTAGGACCCACCCAAGGACAGTACACACCAATTAAGGCGGACCGTCTGGACAGGCCTGAAGTTCAACTACGAGCTTTTTAACTGCAACAACTTTAATATACGCTATTGGAGCTGGAATTACCGCGGCTGCTGGCACCAGACTTGCCCTCCAA	LR736472	KM522532.1	Uncultured Glomeromycota clone R-LP2-11 18S ribosomal RNA gene, partial sequence	100	100	5.59e-175	gb|FR693614	100	100	5.36e-179	Paraglomerales	Paraglomeraceae	Paraglomus	Para1	VTX00335
OTU72	CCCAACTATCCCTATTAATCATTACGGTGATCCTAGAAACCAACAAAATAGAATCATGCCGTCCTATTTCGTTATTCCATGCTAATCTATTCAAGCATAAAGCCTGCTTTAAACACTCTAATTTTTTCAAAGTAACAGTCCTAGCTCCCTATTACACCTAGTGAAAGGCATAGTAGTTCACTAGAAGGTGGAGATTGACATTACCAGTACATATCCGAAGACACGACCGGTACGCCAATCCCGAAATTCAACTACGAGCTTTTTAACTGCAACAACTTTAATATACGCTATTGGAGCTGGAATTACCGCGGCTGCTGGCACCAGACTTGCCCTCCAA	LR736473	HG972876.1	Uncultured Glomus partial 18S rRNA gene, isolate Borracho cay, clone BO3A-11	100	94.706	1.62e-145	gb|KC579431	100	89.412	1.62e-119	Glomerales	Claroideoglomeraceae	Claroideoglomus	sp.	VTX00193
OTU73	CCCAACTATCCCTATTAATCATTACGTCGATCCTAGAAACCAACAAAATAAAATCAAACGTCCTATTTCGTTATTCCATGCTAATGTATTCAAGCGTGAGCCTGCTTTAAACACTCTAATTTTTTCAAAGTAACAGTCCTGATTCCCCAAAACACCAAATTAATGGCATTATGATTCGTCAGAAAGGAGAAACCAATAATACCAGTACGTACAAAAGCACGACCAGTAAACCGGTCTCGAAATTCAACTACGAGCTTTTTAACTGCAACAACTTTAATATACGCTATTGGAGCTGGAATTACCGCGGCTGCTGGCACCAGACTTGCCCTCCAA	LR736474	KM085145.1	Uncultured Glomeraceae clone sp603 18S ribosomal RNA gene, partial sequence	100	100	9.24e-173	gb|JN009269	100	100	8.85e-177	Glomerales	Glomeraceae	Glomus	Liu2012b Phylo-9	VTX00125
OTU74	CCCAACTATCCCTATTAATCATTACGTCAATCCTAGAAACCAACAAAATAGGATCAAACGTCCTATTTCATTATTCCATGCTAATGTATTCAAGCGTTAGCCTGCTTTAAACACTCTAATTTTTTCAAAGTAACAGTCCTGTTTCCCTGCAACACCAAATTAATGGCATTACAGTTCTTCAGAAAGGAGGAACCAGCGAGACCAGTACGAACCAAAGGCACGACCAACCTGCTGATCCCGAAATTCAACTACGAGCTTTTTAACTGCAACAACTTTAATATACGCTATTGGAGCTGGAATTACCGCGGCTGCTGGCACCAGACTTGCCCTCCAA	LR736475	JX296772.1	Uncultured Glomeromycota clone K103_4 18S ribosomal RNA gene, partial sequence	100	98.204	2.61e-163	gb|JQ654570	100	97.904	1.17e-165	Glomerales	Glomeraceae	Glomus	Kluber12 OTU14	VTX00084
OTU75	CCCAACTATCCCTATTAATCATTACGGTGATTCAGAAACCAACAAAACAGGACCACCGTCCTATTCTATTATTCCATGCTAATGTATTCAGACGTAAGCCTGCTTTGAACACTCTAATTTTTTCAAGGTAAAGGTCCTGGTTTCCCACCACGCTAAATTAATAACATGATGGTTCCCCAGAAGGTAAGAATTCTACACGCTAGTACAGACCGGATAGCCCGACCAACGGTAAAATCCTGAAATTCAACTACGAGCTTTTTAACTGCAACAACTTTAATATACGCTATTGGAGCTGGAATTACCGCGGCTGCTGGCACCAGACTTGCCCTCCAA	LR736476	KM602762.1	Uncultured Glomeromycota clone S-TE1-54 18S ribosomal RNA gene, partial sequence	100	98.498	2.01e-164	gb|HM440276	100	98.498	1.93e-168	Diversisporales	Gigasporaceae	Scutellospora	sp.	VTX00052
OTU76	CCCAACTATCCCTATTAATCATTACGTCAATCCTAGAAACCAACAAAATAAGATCAACGTCCTATTTCATTATTCCATGCTAATGTATTCAAGCGTGAGCCTGCTTTAAACACTCTAATTTTTTCAAAGTAACAGTCCTGATTCCCTACCACACCAAATTAATGGCATGATAGTTCTTCAGAAGGGAGAAATCAGTAGCACCAGTGCATACCAGAGGCACGACCAGCGCACTGATTCCGAAATTCAACTACGAGCTTTTTAACTGCAACAACTTTAATATACGCTATTGGAGCTGGAATTACCGCGGCTGCTGGCACCAGACTTGCCCTCCAA	LR736477	JQ315301.1	Uncultured Glomus clone oTU36b 18S ribosomal RNA gene, partial sequence	100	100	9.24e-173	gb|DQ371697	100	95.821	5.48e-154	Glomerales	Glomeraceae	Glomus	Franke A	VTX00093
OTU77	CCCAACTATCCCTATTAATCATTACGTCGATCCTAGAAACCAACAAAATAGAATCAAACGTCCTATTTCATTATTCCATGCTAATGTATTCAAGCGTGAGCCTGCTTTAAACACTCTAATTTTTTCAAAGTAACAGTCCTGATTCCCCAAGACACCAAATTAATGACATCATAGTTCGTCAGAAGGAAGAAACCAATAAATTAGTACGTACCAAGGCACGACCAACATATTGATCCCGAAATTCAACTACGAGCTTTTTAACTGCAACAACTTTAATATACGCTATTGGAGCTGGAATTACCGCGGCTGCTGGCACCAGACTTGCCCTCCAA	LR736478	KM599709.1	Uncultured Glomeromycota clone R-WD1b-15 18S ribosomal RNA gene, partial sequence	100	99.699	1.54e-170	gb|JN009224	100	99.398	6.87e-173	Glomerales	Glomeraceae	Glomus	Liu2012b Phylo-4	VTX00159
OTU78	CCCAACTATCCCTATTAATCATTACGTCAATCCTAGAAACCAACAAAATAGGGTCAAACGTCTTATTTCATTATTCCATGCTAATGTATTCAAGCGTGTGCCTGCTTTAAACACTCTAATTTTTTCAAAGTAACAGTCCTGATTTCCCATGACACCAAATTAATGACATCATGGTTTGTCAGAAGGTAGAAATCAACGATGCCAGTACGTACCGGAGGCACGACCGACATGTTGATCCCGAAATTCAACTACGAGCTTTTTAACTGCAACAACTTTAATATACGCTATTGGAGCTGGAATTACCGCGGCTGCTGGCACCAGACTTGCCCTCCAA	LR736479	KM600088.1	Uncultured Glomeromycota clone S-WA2-69 18S ribosomal RNA gene, partial sequence	100	98.802	1.21e-166	gb|HF566875	96	98.746	2.52e-162	Glomerales	Glomeraceae	Glomus	MO-G50	VTX00370
OTU79	CCCAACTATCCCTATTAATCATTACGTCAATCCTAGAAACCAACAAAATAGAATCAAACGTCCTATTTCATTATTCCATGCTAATGTATTCAAGCGCGAGCCTGCTTTAAACACTCTAATTTTTTCAAAGTAACAGTCCTGATTCCCCATGACATCAAATTAATGACATCATGATTCATCAGAAGGGAGAAATCAATAATACTAGTACGTACCAATGGCACGACCAGCATATTAATCCCGAAATTCAACTACGAGCTTTTTAACTGCAACAACTTTAATATACGCTATTGGAGCTGGAATTACCGCGGCTGCTGGCACCAGACTTGCCCTCCAA	LR736480	AM946888.1	uncultured Glomus partial 18S rRNA gene, clone 1AaA_bg	100	100	2.58e-173	gb|AJ563901	100	98.802	1.16e-170	Glomerales	Glomeraceae	Glomus	Wirsel OTU12	VTX00188
OTU80	CCCAACTATCCCTATTAATCATTACGTCAATCCTAGAAACCAACAAAATAGGATCGAACGTCCTATTTCATTATTCCATGCTAATGTATTCAAGCGCGAGCCTGCTTTAAACACTCTAATTTTTTCAAAGTAACAGTCCTGATTCCCTGCCACACCAAATTAATGACATGACAGTTCGTCAGAAGGGAGGAATCAGAAACACCAGTACATACCAGAAGCATGACCAGCGAACTGACCCCGAAATTCAACTACGAGCTTTTTAACTGCAACAATTTTAATATACGCTATTGGAGCTGGAATTACCGCGGCTGCTGGCACCAGACTTGCCCTCCAA	LR736481	JX296955.1	Uncultured Glomeromycota clone K80_6 18S ribosomal RNA gene, partial sequence	100	97.015	1.22e-156	gb|EU340294	100	97.006	1.17e-160	Glomerales	Glomeraceae	Glomus	NF05	VTX00322
OTU81	CCCAACTATCCCTATTAATCATTACGTCGATCTAAGAAACCAACAAAATAAGATCAACGTCCTATTTCATTATTCCATGCTAATGTATTCAAGCGCGAGCCTGCTTTAAACACTCTAATTTTTTCAAAGTAACAGTCCTGATTCCCCGTCACACTAAATTAATGGCATGACGGTTCGTTAGAAGGAAGGAATCAGTGACACTAGTACATACCGAAGCATGACCGGCGTACTGATTCCGAAATTCAACTACGAGCTTTTTAACTGCAACAACTTTAATATACGCTATTGGAGCTGGAATTACCGCGGCTGCTGGCACCAGACTTGCCCTCCAA	LR736482	AM946784.1	uncultured Glomus partial 18S rRNA gene, clone 2SaC_ra	100	99.699	1.54e-170	gb|LN617842	94	99.678	6.97e-163	Glomerales	Glomeraceae	Glomus	sp.	VTX00206
OTU82	CCCAACTATCCCTATTAATCATTACGTCAATCCTAGAAACCAACAAAATAGGTTCGATCGTCCTATTTCATTATTCCATGCTAATGTATTCAAGCGTTTGCTTGCTTTAAACACTCTAATTTTTTCAAAGTAACAGTCCTGTTTCCCTGCAACACCAAATTAATGGCATCACAGTTCCTCAAGAAGGAGGAATCAGTAGGGCCAGTACATACCAGTGGCACGACCGACCCACTGATCCCGAAATTCAACTACGAGCTTTTTAACTGCAACAACTTTAATATACGCTATTGGAGCTGGAATTACCGCGGCTGCTGGCACCAGACTTGCCCTCCAA	LR736483	KM600127.1	Uncultured Glomeromycota clone S-WA3-39 18S ribosomal RNA gene, partial sequence	100	97.904	1.22e-161	gb|JQ246060	100	97.605	5.42e-164	Glomerales	Glomeraceae	Glomus	sp.	VTX00089
OTU83	CCCAACTATCCCTATTAATCATTACGGTGGTCCTAGACCAACAAAATAGAACCAACGTCCTATTTTATTATTCCATGCTAATCTATTCAAGCAAAAGCCCGCTTTAAACACTCTAATTTTTTCAAGGTAATGGTCCTGGTTCCCACGGCACACGCGATAAAAGAACGTGCCGGTTCACCAGAAGGTAAGACCCGACACAGAACAGTACTCGCCAAAGACGGACCGCCCGGCCAGGCCTAAAATTCAACTACGAGCTTTTTAACTGCAACAACTTTAATATACGCTATTGGAGCTGGAATTACCGCGGCTGCTGGCACCAGACTTGCCCTCCAA	LR736484	KM085110.1	Uncultured Archaeosporales clone sp401 18S ribosomal RNA gene, partial sequence	100	98.498	7.24e-164	gb|KC708345	100	98.198	3.23e-166	Archaeosporales	Archaeosporaceae	Archaeospora	Desiro13a MIB 8442	VTX00009
OTU84	CCCAACTATCCCTATTAATCATTACGGTGATCCTAGAAACCAACAAAATAGAACCATGCCGTCCTATTCTATTATTCCATGCTAATGTATTCGAGCAAAAATGCCTGCTTTAAACACTCTAATTTTTTCAAGGTAAAGGTCCTGGATCCGCAAGACACCCAAAATTAAGGACATCCAAGTTTCTCCAGAAGGTGAGAAATCAACAGCAACAGTTCATACCCCCTCCTTAAGGCACACGACCATCACACGTCAATCCCGAAATTCAACTACGAGCTTTTTAACTGCAACAACTTTAATATACGCTATTGGAGCTGGAATTACCGCGGCTGCTGGCACCAGACTTGCCCTCCAA	LR736485	JN788658.1	Uncultured Glomus clone EJJ13 18S ribosomal RNA gene, partial sequence	100	96.875	1.29e-161	gb|JN252440	100	96.591	5.74e-164	Glomerales	Claroideoglomeraceae	Claroideoglomus	Early-1	VTX00056
OTU85	CCCAACTATCCCTATTAATCATTACAGTGATTCAAAAACCAACAAAACAGGACCACCGTTCTATTTTATTATTCTATGCTAATGTATTCAGACGTAAGCCTGCTTTGAACACTCTAATTTTTTCAAGGTAAAGGTCCTGGTTTCCCACCACGCTAAATAAATAACATGATGGTTCTCCAGAAGGTAGAAATTCCACACGCCAGTACAGACTATTGCCCAACCAATGGTAGAACTCCGAAATTCAACTACGAGCTTTTTAACTGCAACAACTTTAATATATACTATTGGAGCTGGAATTACCGTGGCTGCTGGCACCAGACTTGCCCTCCAA	LR736486	HF968778.1	Gigaspora margarita partial 18S rRNA gene, strain BEG152, isolate spore 2, clone FS2_12_5	100	96.979	5.64e-155	gb|EU340326	100	96.375	1.17e-155	Diversisporales	Gigasporaceae	Gigaspora	NF32	VTX00039
OTU86	CCCAACTATCCCTATTAATCATTATGTCGATCCTAGAAACCAACAAAATAAAATCAAACGTCCTATTTCATTATTCCATGCTAATGTATTCAAGCGTGCGCCTGCTTTAAACACTCTAATTTTTTCAAAGTAACAGTCCTGATTCCTCATGACACCAAATTAATGACATCGCGGTTCTTCAGAAGGTAGGAACCAATAATGCCAGTGCGTACCGAGGCACGACCGACAATCTGATTCCGAAATTCAACTATGAGCTTTTTAACTGCAACAACTTTAATATACGCTATTGGAGCTGGAATTACCGCGGCTGCTGGCACCAGACTTGCCCTCCAA	LR736487	HF913531.1	Uncultured Glomus partial 18S rRNA gene, isolate PC_31	100	98.498	2.01e-164	gb|JN009334	100	98.198	8.98e-167	Glomerales	Glomeraceae	Glomus	Liu2012b Phylo-12	VTX00143
OTU87	CCCAACTATCCCTATTAATCATTACGTCAATCCTAGAAACCAACAAAATAGGATCAAACGTCCTATTTCATTATTCCATGCTAATGTATTCAAGCGATTGCCTGCTTTAAACACTCTAATTTTTTCAAAGTAACAGCCCTGTTTTCCCGCAACACCAAATTAATGGCATTACGGTTCTACAAGAAGGAGGAACCATCGAAATCAGTACATACCAGAGGCACGACCAACCTGATGATCCCGAAATTCAACTACGAGCTTTTTAACTGCAACAACTTTAATATACGCTATTGGAGCTGGAATTACCGCGGCTGCTGGCACCAGACTTGCCCTCCAA	LR736488	EU417583.1	Uncultured Glomus from Afrothismia gesnerioides VM50 clone b 18S ribosomal RNA gene, partial sequence	100	99.701	1.2e-171	gb|EU417582	100	99.701	1.15e-175	Glomerales	Glomeraceae	Glomus	Afrothismia gesnerioides symbiont	VTX00076
OTU88	CCCAACTATCCCTATTAATCATTACGTCAATCCTAGAAACTAACAAAATAGAATCAAACGTCCTATTTTATTATTCCATGCTAATGTATTCAAGCGTAAGCCTGTTTTAAACACTCTAATTTTTTCAAAGTAACAGTCCTGATTCCCCACGACACCAAATTAATGACATCGCAGTTCTTCAGAAGGGAGGAACTAATAATACCAGTGCGTACCAAAGCACAACTGACAATTTGATCCCAAAATTTAACTACGAGCTTTTTAACTGTAACAACTTTAATATACACTATTGGAGCTAGAATTACTACAGCTGCTAGCACCAGACTTGCCCTCCAA	LR736489	KM602757.1	Uncultured Glomeromycota clone S-TE1-49 18S ribosomal RNA gene, partial sequence	100	94.595	9.64e-143	gb|JN009160	100	94.294	4.3e-145	Glomerales	Glomeraceae	Glomus	sp.	VTX00143
OTU89	CCCAACTATCCCTATTAATCATTACGTGATCCTAGAAACCAACAAAACGGAACCACTGTCCTATTTCATTATTCCATGCTAATGTATTCAAGCAAATTAATGCCTGCTTTAAACACTCTAATTTTTTCAAAGTAAAAATTCTAGTTCATTGAGACACCCATTAAGAACATCAACAATTCACCAGAAGGTGAGAAATTGGCTACACCAGTTCATGCCCCTTAAGGCACGACCGATGCATCAATTCCGAAATTCAACTACGAGCTTTTTAACCGCAGCAACTTTAATATACGCTATTGGAGCTGGAATTACCGCAATGGCTGCCAACACCAGACTTGCCCTCCAA	LR736490	FN869794.1	Uncultured Glomus partial 18S rRNA gene, clone La-13	100	99.128	2.65e-173	gb|FN869794	100	99.128	2.54e-177	Glomerales	Claroideoglomeraceae	Claroideoglomus	Glo G8	VTX00340
OTU90	CCCAACTATCCCTATTAATCATTACGTGGTCCTAAAACCAACAAAATAGAACACCGTCCTATTTTATTATTCCATGCTAATGTATTCAAGCAAAAATGCCCGCTTTAAACACTCTAATTTTTTCAAAGTAAAGGTCCTAGTTCATTGAAACACCCAATTAAGAAGCATCCCAATTCACCAGAAGGTAAGAAATTGGCTACACACCGATTCATGCCCCTAAAAGCACGACCAATATATCCCAATCCCGAAATTCAACTACGAGCTTTTTAACCGCAACAACACTAATATACGCTATCGGAGCTGGAATTACCGCGGCTGCTAATACCAGACTTGCCCTCCAA	LR736491	KJ740899.1	Uncultured Glomeromycota clone 2013.FS.ZD91-4.51 18S small subunit ribosomal RNA gene, partial sequence	100	99.707	1.58e-175	gb|HG004493	100	95.029	3.38e-151	Glomerales	Claroideoglomeraceae	Claroideoglomus	Torrecillas 13 Cl3	VTX00402
OTU91	CCCAACTATCCCTATTAATCATTACGTCGATCCTAGAAACCAACAAAATAGGAGATCAAACGTCCTATTTTATTATTCCATGCTAATGTATTCAAGCGCGAGCTTGCTTTAAACACTCTAATTTTTTCAAAGTAACAGTCCTGATTCCCCGCCACACCAACTAAATAGCATAACGGTTCATCAGAAGGGAGGAATCAGTGACACCGAAGGTACGACCAGCTTACTGATCCCGAAATTCAACTACGAGCTTTTTAACTGCAACAACTTTAATATACGCTATTGGAGCTGGAATTACCGCGGCTGCTGGCACCAGACTTGCCCTCCAA	LR736492	JF719662.1	Uncultured Glomus clone TY271BB9 18S ribosomal RNA gene, partial sequence	100	90.476	9.75e-118	gb|FR773149	100	88.988	7.34e-113	Glomerales	Glomeraceae	Glomus	clarum	VTX00090
OTU92	CCCAACTATCCCTATTAATCATTACGTCAATCCTAGAAACCAACAAAATAGAATCAAACGTCCTATTTCATTATTCCATGCTAATGTATTCAAGTGTGCGCCTGCTTTAAACACTCTAATTTTTTCAAAGTAACAGTCCTGATTCCCCACGACACCAAATTAATGACATCGTAGTTCTTCAGAAGGTAGGAACCAATAATGCCAGTGTGTACCGAAGCACGACCGACAATTTGATCCCGAAATTCAACTACGAGCTTTTTAACTGCAACAACTTTAATATATGCTATTGGAGCTGGAATTACCGCAGCTGCTGGCACCAGACTTGCCCTCCAA	LR736493	KJ452278.1	Uncultured Glomeraceae clone P-A12 small subunit ribosomal RNA gene, partial sequence	100	97.598	2.03e-159	gb|FR848070	100	97.598	1.94e-163	Glomerales	Glomeraceae	Glomus	Alguacil11d Glo G15	VTX00143
OTU93	CCCAACTATCCCTATTAATCATTACGGTGATCCTAGAAACCAACGAAATAGAATCAGTCCGTCCTATTTCATTATTCCATGCTAATGTATTCAGACGTTAGCCTGCTTTAAACACTCTAATTTTTTCAAAGTAACAGTCCTGATTTCCAATCACACCAAATTAATGACATGAAAGTTCCTCAGAAGGTAGAGATTTATCTCACCAGTACAGACAATTAAGCCTGACCAATGGGTAAACCCCGAAGTTCAACTACGAGCTTTTTAACTGCAACAACTTTAATATACGCTATTGGCGGCTGCTGGCACCAGACTTGCCCTCCAA	LR736494	KM602263.1	Uncultured Glomeromycota clone S-TB2-1 18S ribosomal RNA gene, partial sequence	100	100	1.53e-150	gb|LN620150	91	100	1.47e-154	Diversisporales	Diversisporaceae	Diversispora	sp.	VTX00060
OTU94	CCCAACTATCCCTATTAATCATTACGGTGGTCCTAGAAACCAACAAAATAGAACCCTTAGCCGTCCTATTTTATTATTCCATGCTAATGTATTCAGACGATAAAGCCTGCTTTAAACACTCTAATTTTTTCAAGGTAATGGTCCTGGTTCCGCCAGACACCAAATAAATGACATCTGACCTCGCCAGAAGGTAAGAGACCCGCGGAGCCAGTGATGGACAGTTAAGCCCAACCGACCCGCGGCTCCCGAAATTCAACTACGAGCTTTTTAACTGCAACAACTTTAATATACGCTATTGGAGCTGGAATTACCGCGGCTGCTGGCACCAGACTTGCCCTCCAA	LR736495	HE576800.1	Uncultured Acaulospora partial 18S rRNA gene, clone H8-3	100	100	9.45e-178	gb|HE576800	100	100	0	Paraglomerales	Paraglomeraceae	Paraglomus	Alguacil12b ACA1	VTX00351
OTU95	CCCAACTATCCCTATTAATCATTACGTGGCCCTAAAACCAACAAAATAAAACCATCGTCCTATTTTATTATTCCATGCTAATGTATTCAAGCAAAAATGCCCGCTTTAAACACTCTAATTTTTTCAAAGTAAAGGTCCTGATGCATCGAAACACCCAAGAGCATCCCGACTCACCAGAAGGTGAGAAATTGGCTACACACCATTTCATGCCCCTAAAGGCACGACCGATATATCCCAATCCCGAAATTCAACTACGAGCTTTTTAACCGCAACAACACTAATATACGCTATTGGAGCTGGAATTACCGCGGCTGCTGGCACCAGACTTGCCCTCCAA	LR736496	KJ740954.1	Uncultured Glomeromycota clone 2013.PS.ZD91-4.20 18S small subunit ribosomal RNA gene, partial sequence	100	98.22	5.67e-165	gb|HE615073	100	94.379	2.6e-147	Glomerales	Claroideoglomeraceae	Claroideoglomus	Torrecillas12b Glo G7	VTX00402
OTU96	CCCAACTATCCCTATTAATCATTACGGTGATCCTAGAAACCAACAAAATAAAACCATGCCATCCTATTTTATTATTCCATGCTAATGTATTCAGGTACTAGCCTACTTTGAGCACTCTAATTTTTTCAAGGTAATAGTCCTGCTTCCCCAACGCACCAAATGAATGGCATACTGGTTATTCAGAAGGTAAGAACCCATCACACCAGTACAGATAGTGAAGTCCGACCGATGGACAGATTCTGAAATTCAACTACGAGCTTTTTAACTGCAACAACTTTAATATACGCTATTGGAGCTGGAATTACTGTGGCTGCTGGCACCAGACTTGCCCTCCAA	LR736497	JX297040.1	Uncultured Glomeromycota clone K14_6 18S ribosomal RNA gene, partial sequence	100	96.429	2.06e-154	gb|JQ246061	100	96.131	9.2e-157	Diversisporales	Acaulosporaceae	Acaulospora	sp.	VTX00024
OTU97	CCCAACTATCCCTATTAATCATTACGTCGATCCTAGAAACCAACAAAATAGAATCAAACGTCCTATTTCATTATTCCATGCTAATGTATTCAAGCGTGAGCCTGCTTTAAACACTCTAATTTTTTCAAAGTAACGGTCCTGATTCCCCACGACACCAAATTAATGACATCGCGATTCATCAGAAAGGAGAAACCAATAATACCAGTGCGTACCGAAGGCACGACCAGCAAATTGATCCCGAAATTCAACTACGAGCTTTTTAACTGCAACAACTTTAATATACGCTATTGGAGCTGGAATTACCGCGGCTGCTGGCACCAGACTTGCCCTCCAA	LR736498	KJ209894.1	Uncultured Glomus clone 77 18S ribosomal RNA, partial sequence	100	100	2.58e-173	gb|JN009289	100	100	2.47e-177	Glomerales	Glomeraceae	Glomus	Liu2012b Phylo-19	VTX00137
OTU98	CCCAACTATCCCTATTAATCATTACAGTGATCCTAGAAACCAACAAAATAGAATCATCCGTCCTATTTTATTATTCCATGCTAATGTATTCAAGCAAATAATGCCTGCTTTAAACACTCTAATTTTTTCAAAGTAAAAGTCCTAGTTCATTGAAACACCCAGTTAAAGAGGCATCACAATTCACCAGAAGGTGAGGAATTGGCTACGCCAGTTCATACCCCTTAAGGCACGACCGATGTGTCAATCCCGAAATTCAACTACGAGCTTTTTAACCGCAGCAACCTTAATATACGCTATTGGAGCTGGAATTACCGCGGCTGCTAATACCAGACTTGCCCTCCAA	LR736499	HF913560.1	Uncultured Claroideoglomus partial 18S rRNA gene, isolate OSB_20	100	99.417	5.71e-175	gb|HE576932	100	96.522	2.6e-162	Glomerales	Claroideoglomeraceae	Claroideoglomus	Alguacil12b GLO G3	VTX00357
OTU99	CCCAACTATCCCTATTAATCATTACGTGGTCCTAAAACCAACAAAATAGAACCATTGTCCTATTTTATTATTCCATGCTAATGTATTCAAGCAAAAATGCCCGCTTTAAACTCTAATTTTTTCAAAGTAAAGGTCCTGATTCATCGAAACACCCAAGAGCATCCTGACTCACCAGAAGGTGAGAAATTGGCTACACACCATTTCATGCCCCTAAAAGCACGACCGATATATCCCAATCCCGAAATTCATATACACTATTGGAGCTGGAATTACCGCGGCTGCTAATACCAGACTTGCCCTCCAA	LR736500	KJ740954.1	Uncultured Glomeromycota clone 2013.PS.ZD91-4.20 18S small subunit ribosomal RNA gene, partial sequence	100	96.8	9.09e-113	gb|HE615073	100	93.227	8.93e-102	Glomerales	Claroideoglomeraceae	Claroideoglomus	Torrecillas12b Glo G7	VTX00402
OTU100	CCCAACTATCCCTATTAATCATTACGGTGATCCTAGAAACCAACAAAATAAGATCAAACGTCCTATTTCATTATTCCATGCTAATGTATTTAAGCGCGAGCCTTCTTTAAACACTAATTTTTTCAAAGTAACAGTCCTGATTCCACGTCACACTAAATTAATGGCATGACGATTCGTCAGAAGGAAGGAATCAGTGACACTAGTACATACCGAAGCATGACCAGTGTACTGATTCCGAAATTCAACTACAAGCTTTTTAACTGCAACAACTTTAATATACGCTATTGGAGCTGGAATTACCGCGGCTGCTGGCACCAGACTTGCCCTCCAA	LR736501	AM946784.1	uncultured Glomus partial 18S rRNA gene, clone 2SaC_ra	100	95.796	2.64e-148	gb|LN617842	94	95.513	1.2e-140	Glomerales	Glomeraceae	Glomus	sp.	VTX00206
OTU101	CCCAACTATCCCTATTAATCATTACGTCGATCCTAGAAACCAACAAAATAGGTTCGAACGTCCTATTTCATTATTCCATGCTAATGTATTCGAGCGATTGCCTGCTTTAAACACTCTAATTTTTTCAAAGTAACAGTCCTGACTCCCCGTAACACCAAATGAATGACATCACGGCTCGTCAGAAGGGAGAAATCAATGACGTTAGTACGTACCGAGGCACGACCGACGTATTGATCCCGAAATTCAACTACGAGCTTTTTAACTGCAACAACTTTAATATACGCTATTGGAGCTGGAATTACCGCGGCTGCTGGCACCAGACTTGCCCTCCAA	LR736502	AB594900.1	Uncultured mycorrhizal fungus gene for 18S ribosomal RNA, partial sequence, clone: 006	100	99.7	4.3e-171	gb|EU350053	100	99.7	4.12e-175	Glomerales	Glomeraceae	Glomus	Glo-D	VTX00103
OTU102	CCCAACTATCCCTATTAATCATTACGTGATCCTAGAAACCAACAAAACAGAACCACCGTCCTATTTCATTATTCCATGCTAATGTATTCAAGCAAATCACTGCCTGCTTTAAACACTCTAATTTTTTCAAAGTAAAAAATTCCAGTTCATTGAGACACCCAATTAAGAACATCACAATTCACCAGAAGATGAGAAATTGGCTACACCAGTTCATGCCCCTTAAGGCACAACCGATGCATCAATTCCGAAATTCAACTACGAGCTTTTTAACCGCAACAACTTTAATATACGCTATTGGAGCTGGAATTACCGCAATGGCTGCTAACACCAGACTTGCCCTCCAA	LR736503	KF134498.1	Uncultured Claroideoglomus clone CLARO-3 18S ribosomal RNA gene, partial sequence	100	98.256	7.46e-169	gb|FN869794	100	96.812	1.56e-164	Glomerales	Claroideoglomeraceae	Claroideoglomus	Glo G8	VTX00340
OTU103	CCCAACTATCCCTATTAATCATTACGGTGATCCTAGAAACCAACAAAATAGAATCATCGTCCTATTTTATTATTCCATGCTAATGTATTCAAGCAATAATGCCTGCTTTAAACACTCTAATTTTTTCAAAGTAAAAGTCCTAGTTCATTGAAACACCCGGTTAAGAAGACATCACAATTCACCAGAAGGTGAGGAATTGGCTACGCCAGTTCGTACCCCTTAAGGCACGACCGATGTATCAATCCCAAAATTCAACTACGAGCTTTTTAACCGCAGCAACCTTAATATACGCTATCGGAGCTGGAATTACCGCGGCTGCTAATACCAGACTTGCCCTCCAA	LR736504	HF913560.1	Uncultured Claroideoglomus partial 18S rRNA gene, isolate OSB_20	100	96.501	9.69e-158	gb|HE576932	100	95.349	4.35e-155	Glomerales	Claroideoglomeraceae	Claroideoglomus	Alguacil12b GLO G3	VTX00357
OTU104	CCCAACTATCCCTATTAATCATTACGTGGTCCTAAAACCAACAAAATAGAACCATCGTCCTATTTTATTATTCCATGCTAATGTATTCAAGCAAAAATGCCCGCTTTAAACACTCTAATTTTTTCAAAGTAAAGGTCCTGGTTCATCGAAACACCCAGAGCATCCCAACTCACCAGAAGGTGAGAAATTGGCTACACACTGTTTCATGCCCCTAAAGGCAAGACCGATATATCCCAATCCCGAAATTCAACTACGAGCTTTTTAACCGCAACAACACTAATATACGCTATTGGAGCTGGAATTACCATGGCTGCTAATACCAGACTTGCCCTCCAA	LR736505	KJ740863.1	Uncultured Glomeromycota clone 2013.PS.ZD-1.56 18S small subunit ribosomal RNA gene, partial sequence	100	97.329	2.05e-159	gb|HG004493	100	96.439	1.98e-158	Glomerales	Claroideoglomeraceae	Claroideoglomus	Torrecillas 13 Cl3	VTX00402
OTU105	CCCAACTATCCCTATTAATCATTACGTCAATCCTAGAAACCAACAAAATAGGATCAAACGTCCTATTTCATTATTCCATGCTAATATATTCAAGCGTTAGCCTGCTTTAAACACTCTAATTTTTTCAAAGTAACAGTCCTGTTTCCCTGCAACACCAAGTAAATGGCATCACAGTTCTTCAAGAAGGAGGAATCAGTAAGGCCAGTACATACCAATGGCACGACCAACCTACTGACCCCGAAATTCAACTACGAGCTTTTTAACTGCAACAACTTTAATATACGCTATTGGAGCTGGAATTACCGCGGCTGCTGGCACCAGACTTGCCCTCCAA	LR736506	KM600323.1	Uncultured Glomeromycota clone S-WB3-66 18S ribosomal RNA gene, partial sequence	100	99.401	5.58e-170	gb|AB555661	100	97.605	5.42e-164	Glomerales	Glomeraceae	Glomus	sp.	VTX00080
OTU106	CCCAACTATCCCTATTAATCATTATGGTGATTCAGAAACCAACAAAACAGGACCACCGTCCTATTTTATTATTCCATGCTAATGTATTCAGACATAAGCCTGCTTTGAACACTCTAATTTTTTCAAGATTAAGGTCCTGGTTTCCTACCACGCTAAATTAATAACATGATAGTTCCCCAGAAGGTAGAAATTCTACACGCCAGTACAGACAATAGCCCGACCAACGATAGAACCCCGAAATTCAACTACGAGCTTTTTAACTGCAACAACTTTAATATACGCTATTGGAGCACCAGACTTGCCCT	LR736507	HF567435.1	Uncultured Scutellospora partial 18S rRNA gene, isolate K1CO-12 VT255, clone 348-long	95	98.969	1.88e-144	gb|HF567435	95	98.969	1.81e-148	Diversisporales	Gigasporaceae	Scutellospora	sp.	VTX00255
OTU107	CCCAACTATCCCTATTAATCATTACGTCAATCCTAGAAACCAACAAAATAGAACCATGCCGTCCTATTTTATTATTCCATGCTAATGTATTCAGGCACTGGCCTGCTTTGAGCACTCTAATTTTTTCAAGGTAATAGTCCTGCTTCCCCAGCGCACCAAGTAAATGGCATGCTGGTTATTCAGAAGGTAAGAACCCACCACGCCAGTACGGACAATGAAGCCCGACCAACGGACAGATTCCGAAATTCAACTACGAGCTTTTTAACTGCAACAACTTTAATATACGCTATTGGAGCTGGAATTACCGCGGCTGCTGGCACCAGACTTGCCCTCCAA	LR736508	JN687473.1	Acaulospora mellea 18S ribosomal RNA gene, partial sequence	100	99.107	2.02e-169	gb|JQ246069	100	97.619	4.22e-165	Diversisporales	Acaulosporaceae	Acaulospora	sp.	VTX00024
OTU108	CCCAACTATCCCTATTAATCATTACGGTTGTCCTAAAAACCAACAAAATAAAACAACTTCGTCCTATTCTATTATTCCATGCTAATGTATTCCGGCATAAGCCTGCTTTAAACACTCTAATTTTTTCAAGGTAAAAGTCCTGACTACCCGTAACATTCAATAAAGAACATTACGTATTACCAGGCGGATAGATCCCACACATTCAGTACTCATCTAAAAGATGGACCAAATGGCAAGATCCAAAATTCAACTACGAGCTTTTTAACTGCAACAACTTTAATATACGCTATTGGAGCTGGAATTACCGCGGCTGCTGGCACCAGACTTGCCCTCCAA	LR736509	KJ740831.1	Uncultured Glomeromycota clone 2012.SS.ZD91-2.46 18S small subunit ribosomal RNA gene, partial sequence	100	98.512	4.37e-166	gb|KF467279	100	96.439	1.98e-158	Archaeosporales	Archaeosporaceae	Archaeospora	Shi14b Arc-27	VTX00245
OTU109	CCCAACTATCCCTATTAATCATTACAGTGATTCAGAAACCAACAAAACAAAACCACCGTCCTATTTTATTATTCCATGCTAATGTATTCAGACGTAAGTCTGCTTTGAACACTCTAATTTTTTCAAGGTAAAGGTCCTGGTTTTCCACCACACTAAATAAATAACATGATGGTTCCCCAGAAGGTAGAAATTCCACACGCCAGTACAGACTATTGCCTGACCAACGGTAGAACCCTGAAATTCAACTACGAGCTTTTTAACTGCAACAACTTTAATATACGCTATTGGAGCTGGAATTACCACGGCTGCTGGCACCAGACTTGCCCTCCAA	LR736510	KM599521.1	Uncultured Glomeromycota clone R-WB3b-18 18S ribosomal RNA gene, partial sequence	100	97.281	1.21e-156	gb|EU332724	100	96.979	5.41e-159	Diversisporales	Gigasporaceae	Gigaspora	sp.	VTX00039
OTU110	CCCAACTATCCCTATTAATCATTACGGTGGTCCTAGACCAACAAAATAGAACCAACGTCCTATTCTATTATTCCATGCTAATCTATTCAAGCAAAAGCCCGCTTTAAACACTCTAATTTTTTCAAGGTAATGGTCCTGGCTCCCCAACACACCCAATAAAGGACATGCTGGCTCACCAGAAGGAAGACCCGACAGCAGACAGTACTCGCCAAAGACGGACCGCCCGGCCAGGCCTAAAATTCAACTACGAGCTTTTTAACTGCAACAACTTTAATATACGCTATTGGAGCTGGAATTACCGCGGCTGCTGGCACCAGACTTGCCCTCCAA	LR736511	JQ315316.1	Uncultured Archaeosporales clone oTU50b 18S ribosomal RNA gene, partial sequence	100	98.503	7.17e-164	gb|HQ258992	100	98.489	8.89e-167	Archaeosporales	Archaeosporaceae	Archaeospora	sp.	VTX00005
OTU111	CCCAACTATCCCTATTAATCATTACGTCAACCCTAGAAACCAACAAAATAGGACGTTTGATCCTATTTTATTATTCCATGCTAATGTATTCAAGCGTTAGCCTGCTTTAAACACTCTAATTTTTTCAAAGTAACAGTCCTGTTTCCCCGCAACACCAAATTAATGGCATCACGGTTCTTCAAGAAGGAGGAATCAGCAAGGCCAGTTCATACCGGTGGCACGACCAACCTGCTGACCCCGAAATTCAACTACGAGCTTTTTAACTGCAACAACTTTAATATACGCTATTGGAGCTGGAATTACCGCGGCTGCTGGCACCAGACTTGCCCTCCAA	LR736512	AM779245.1	Uncultured glomeromycete partial 18S rRNA gene, clone S86	100	97.605	2.04e-159	gb|JQ246036	100	97.313	2.52e-162	Glomerales	Glomeraceae	Glomus	sp.	VTX00359
OTU112	CCCAACTATCCCTATTAATCATTACGTCAATCCTAGAAACCAACAAAATAAGATCAACGTCCTATTTCATTATTCCATGCTAATGTATTCAAGCGTGAGCCTGCTTTAAACACTCTAATTTTTTCAAAGTAACAGTCCTGATTTCCCACCACACCAAGTAAATGGCATGATAGTTCGTCAGAAGGAAGGAATCAGTAACACCAGTACATACCCGAAAGCACGACCAACGTACTGATCCCGAAATTCAACTACGAGCTTTTTAACTGCAACAACTTTAATATACGCTATTGGAGCTGGAATTACCGCGGCTGCTGGCACCAGACTTGCCCTCCAA	LR736513	KM114431.1	Glomeromycota sp. AB-2014 isolate OTU07_ROcS 18S ribosomal RNA gene, partial sequence	100	99.102	2.6e-168	gb|KF879033	100	96.108	4.25e-155	Glomerales	Glomeraceae	Glomus	Deepika15 Glo P3	VTX00364
OTU113	CCCAACTATCCCTATTAATCATTACGTCAATCCTAGAAACCAACAAAATAAGATCGAACGTCCTATTTCATTATTCCATGCTAATGTATTCAAGCGATTGCCTGCTTTAAACACTCTAATTTTTTCAAAGTAACAGTCCTGTTTCCCCGCAACACCAAATTAATGGCATTACGGTTCTTCAAGAAGGAGGGACCACCGAAGCAAGTACATACCGGAGGCACGACCAACCTGATGATCCCGAAATTCAACTACGAGCTTTTTAACTGCAACAACTTTAATATACGCTATTGGAGCTGGAATTACCGCGGCTGCTGGCACCAGACTTGCCCTCCAA	LR736514	JX296794.1	Uncultured Glomeromycota clone K56_3 18S ribosomal RNA gene, partial sequence	100	98.802	1.21e-166	gb|FR848013	100	98.503	5.38e-169	Glomerales	Glomeraceae	Glomus	Alguacil11d Glo G3	VTX00269
OTU114	CCCAACTATCCCTATTAATCATTACGGTGGTCCTAGCCCAACAAAATAGAACCAACATCCTATTCTATTATTCCATGCTAATCTATTCAAGCAAAAACCCGCTTTAAACACTCTAATTTTTTCAAGGTAATGGTCCTGGTTCCCCGACACACCCAATAAAGGGCATACTGGCTCACCAGAAGGATAGACCCGACAGCAGAACAGTACTCGCCAGAGACGGACCGTCCAGTCAGGCCTAAAATTCAACTACGAGCTTTTTAACTGCAACAACTTTAATATACGCTATTGGAGCTGGAATTACCGTGGCTGCTGGCACCAGACTTGCCCTCCAA	LR736515	AB909083.1	Uncultured Glomeromycota gene for 18S ribosomal RNA, partial sequence, clone: SH04-04-09	100	98.193	3.36e-162	gb|LN619063	94	98.071	1.52e-154	Archaeosporales	Archaeosporaceae	Archaeospora	sp.	VTX00004
OTU115	CCCAACTATCCCTATTAATCATTACGTCGATCCTAGAAACCAACAAAATAAAATCAAACGTCCTATTTCGTTATTCCATGCTAATGTATTCAAGCGTGAGCCTGCTTTAAACACTCTAATTTTTTCAAAGTAACAGTCCTGATTCCCTAAAACACCAAATTAATGGCATTATAGTTCGTCAGAAGAGAGAAACCGATTATACTAGTACGTACAAAAGCACGACCAGTAGACCGGTCTCGAAATTCAACTACGAGCTTTTTAACTGCAACAACTTTAATATACGCTATTGAAGCTAGAATTACCGCGGCTGCTGGCACCAGACTTGCCCTCCAA	LR736516	DQ388618.1	Uncultured Glomus clone ETC6 18S ribosomal RNA gene, partial sequence	100	99.099	9.3e-168	gb|FR848068	100	98.799	4.15e-170	Glomerales	Glomeraceae	Glomus	Alguacil11d Glo G15	VTX00222
OTU116	CCCAACTATCCCTATTAATCATTACGGTGATCCTAGAAACCAACAAAATAGAATCATGCCGTCCTATTTTATTATTCCATGCTAATGTATTCAAGCAAAAATGCCTGCTTTAAACACTCTAATTTTTTCAAAGTAAAGGTCCTGGTTCCTCGTGGCACCCAATAAAGGACATCACGGTTCTCCAGAAGGTGAGAAATTCACTACACCGGTTCATACCCCTTAAGGCACGACCGATGTGCAAATCCCGAAATTCAACTACGAGCTTTTTAACTGCAACAACTTTAATATACGCTATTGGAGCTGGAATTACCGCGGCTGCTGGCACCAGACTTGCCCTCCAA	LR736517	HG004533.1	Uncultured Glomus partial 18S rRNA gene, clone SS-1	100	99.707	1.58e-175	gb|HG004533	100	99.707	1.51e-179	Glomerales	Claroideoglomeraceae	Claroideoglomus	Torrecillas 13 Cl9	VTX00193
OTU117	CCCAACTATCCCTATTAATCATTACAGTGATCCTAGAAACCAACAAAATAGAATCATTGTCCTATTTTATTATTCCATGCTAATGTATTCAAGCAAATAATGCCTGCTTTAAACACACTAATTTTTTCAAAGTAAAAAGTCCTAGTTCATTGAAACACCCAATTAAGGAGGGCATCACAATTCACCAGAAGGTAAGAAATTGGCTACACCGGTTCATACCTCTTAAGGCACGACCGATGCATCAATCCCGAAATTCAACTACGAGCTTTTTAACCGCAGCAACCTTAATATACGCTATTGGAGCTGGAATTACCGCGGCTGCTAATACCAGACTTGCCCTCCAA	LR736518	HE576932.1	Uncultured Glomus partial 18S rRNA gene, clone S8-25	100	98.547	1.6e-170	gb|HE576932	100	98.547	1.53e-174	Glomerales	Claroideoglomeraceae	Claroideoglomus	Alguacil12b GLO G3	VTX00357
OTU118	CCCAACTATCCCTATTAATCATTACGATGGTCCTAGAAACCAACAAAATAGAATCATCGTCCTATTCTATTATTCCATGCTAATGTATTCCGGCATAAGCCTGCTTTAAACACTCTAATTTTTTCAAGGTAAAGGTCCTGGCTGCTCGCAACACTCAATTAAGAACATTACGCATCACCAGGCGGTGAGGCCCAACCGACCAGTACTCGTTACAAGAACGGACCAATCGGCCAAACCCAAAATTCAACTACGAGCTTTTTAACTGCAACAACTTTAATATACGCTATTGGAGCTGGAATTACCGCGGCTGCTGGCACCAGACTTGCCCTCCAA	LR736519	MH629114.1	Uncultured Archaeospora clone 1UWWLS1-3 small subunit ribosomal RNA gene, partial sequence	100	98.5	0	gb|HF954752	94	100	4.18e-165	Archaeosporales	Archaeosporaceae	Archaeospora	sp.	VTX00338
OTU119	CCCAACTATCCCTATTAATCATTACATCGATCCTAGAAACCAACAAAATAGAATCGGATGTCCTATTTCATTATTCCATGCTAATGTATTCAAGCGTGAGCCTGCTTTAAACACTCTAATTTTTTCAAGGTAACAGTCCTAATTCCCCGTGACACCAAATTAATGGCATTACGGTTCTTTAGAAGGTGAGAAATCAATAATATCAGTACATACCAACGGTAGAATCCCGAAATTCAACTACGAGCTTTTTAACTGCAACAACTTTAATATACGCTATTGGAGCTGGAATTACCGCGGCTGCTGGCACCAGACTTGCCCTCCAA	LR736520	KM522197.1	Uncultured Glomeromycota clone S-KS4-21 18S ribosomal RNA gene, partial sequence	100	96.418	1.54e-150	gb|Y17653	100	96.418	1.48e-154	Glomerales	Glomeraceae	Glomus	caledonium	VTX00065
OTU120	CCCAACTATCCCTATTAATCATTACGTCGAACCTATTTCGTTATTCCATGCTAATGTATTCAAGCGCGAGCCTGCTTTAAGCACTCTAATTTTTTCAAAGTAACAGTCCTGTTTCCCCGCAACAACAAATTAATGCCATCACGGTTCTACAAGAAGGAGGGACCAGTGAGGCCAGTGCATACCAGTGGCACGACCAACCTACTGGCCCCGAAATTCAACTACGAGCTTTTTAACTGCAACAACTTTAATATACGCTATTGGAGCTGGAATTACCGCGGCTGCTGGCACCAGACTTGCCCTCCAA	LR736521	AB594865.1	Uncultured mycorrhizal fungus gene for 18S ribosomal RNA, partial sequence, clone: 0164	100	99.634	8.77e-138	gb|JQ246031	100	99.267	3.93e-140	Glomerales	Glomeraceae	Glomus	sp.	VTX00070
OTU121	CCCAACTATCCCTATTAATCATTACGTCAATCCTAGAAACCAACAAAATAGGATCAACGTCCTATTTCATTATTCCATGCTAATGTATTCAAGCGCGAGCCTGCTTTAAACACTAATTTTTTCAAAGTAACAGTCCTGATTCCCCGCCACACCAAATGAATGACATGATGGTTCGTCAGAAGGTAGGAACCAGTAATACCAGTACGTACCTAAGGCACGACCAACGTACTGATCCCGAAATTCAACTACGAGCTTTTTAACTGCAACAACTTTAATATACGCTATTGGAGCTGGAATTACCGCGGCTGCTGGCACCAGACTTGCCCTCCAA	LR736522	KM600567.1	Uncultured Glomeromycota clone S-WD2-27 18S ribosomal RNA gene, partial sequence	100	99.099	3.32e-167	gb|JQ654503	100	98.198	3.21e-166	Glomerales	Glomeraceae	Glomus	Kluber12 OTU3	VTX00219
OTU122	CCCAACTATCCCTATTAATCATTACGTTGATCCTAGAAACCAACAAAATAGGATCGAACGTCCTATTTCATTATTCCATGCTAATGTATTCAAGCTAATGCCTGCTTTAAACACTCTAATTTTTTCAAAGTAACAGTCCTAACTCCCCATAACACCAAATTAATGACATCATGGTTCGTCAGAAAGGAGAAACCAATAACGCCAGTGCGTACCAAAAAAGCACGACCGACGTATTGATCCCGAAATTCAACTACGAGCTTTTTAACTGCAACAACTTTAATATACGCTATTGGAGCTGGAATTACCGCGGCTGCTGGCACCAGACTTGCCCTCCAA	LR736523	KM600544.1	Uncultured Glomeromycota clone S-WD2-2 18S ribosomal RNA gene, partial sequence	100	99.702	9.33e-173	gb|KC708360	100	99.405	4.16e-175	Glomerales	Glomeraceae	Glomus	Desiro13a MIB 8870	VTX00191
OTU123	CCCAACTATCCCTATTAATCATTACGGCGGTTCTAGAAACCAACAAAATAGCCCCACGCGTCCTATTTCATTATTCCATGCTAATGTATCCGAGCATGCGCCTGCTTTGAACACTCTAATTTTTTCAAGGTAATGGTCCTGGTTCCCCGACACACCCAACAAAGGACATGCCGACTCACCAGAAGGATAGGCCCGGCGTCGGAACAGTGCTCACCCGGAGGGCGGACCGCCCGGCCAGACCCAAAATTCAACTACGAGCTTTTTAACTGCAACAACTTTAATATACGCTATTGGAGCTGGAATTACCGCGGCTGCTGGCACCAGACTTGCCCTCCAA	LR736524	AB909114.1	Uncultured Glomeromycota gene for 18S ribosomal RNA, partial sequence, clone: TE04-04-12	100	100	5.59e-175	gb|GU238376	100	99.11	5.4e-174	Archaeosporales	Ambisporaceae	Ambispora	Amb-1	VTX00283
OTU124	CCCAACTATCCCTATTAATCATTACCGTGGCCTCGGAAACCAACAAAATAAGACCAAGGTCCTATTCCATTATTCCATGCTAATCTATTCGAGCGTGCGCCCGCTTTGAACACTCTAATTTTTTCAAGGTAAACGTCCTGGCTCCCCGCAGACCGCCCCTCGCGGAGCGACCCACGGTTCCCCAGAAGGGAAGGACCGGCCCATGAGCAGTGCGCACCGAAACGGTGGACCGCCCGGCCAGACCCGAAGTTCGACTACGAGCTTTTTAACTGCAACAACTTTAATATACGCTATTGGAGCTGGAATTACCGCGGCTGCTGGCACCAGACTTGCCCTCCAA	LR736525	AB047303.1	Archaeospora leptoticha gene for 18S rRNA, isolate: MAFF520055, sub_clone: f3b21	100	85.756	8.18e-94	gb|AB047308	100	85.756	7.84e-98	Archaeosporales	Ambisporaceae	Ambispora	callosa	VTX00242
OTU125	CCCAACTATCCCTATTAATCATTACGTCAATCCTAGAAACCAACAAAATAGGATCGAACGTCCTATTTCATTATTCCATGCTAATGTATTCAGGCGTTAGCCTGCTTTAAACACTCTAATTTTTTCAAAGTAACAGTCCAGATTCCCTGCAACACCAAATTAATGGCATTACAGTTCATCAGGAAGGAGGAATCAGTGAAACCAGTACATACCAGTGGCATGACCAACCTACTGACCCCGAAATTCAACTACGAGCTTTTTAACTGCAACAACTTTAATATACGCTATTGGAGCTGGAATTACCGCGGCTGCTGGCACCAGACTTGCCCTCCA	LR736526	KM522310.1	Uncultured Glomeromycota clone R-KS2-6c 18S ribosomal RNA gene, partial sequence	100	99.7	4.3e-171	gb|GU238405	100	99.7	4.12e-175	Glomerales	Glomeraceae	Glomus	Glo-A2	VTX00325
OTU126	CCCAACTATCCCTATTAATCATTACGTCGACCCTAGAAACCAACAAAATAGGGTCAAATGTCCTATTTCATTATTCTATGCTAATGTATTCAAGCGTGTGTCTGCTTTAAACACTCTAATTTTTTCAAAGTAACAGTCCTGATTCCCCATGATACCAAATTAATAACATCACAGTTCGTCAGAAGGTAGAAATCAATAATACCAGTGCATACCGGAGGCACGACCAATATATTAATCCTGAAATTCAACTACGAGTTTTTTAACTGCAACAACTTTAATATACGCTATTGGAGCTGGAATTACCGCGGCTGCTGGCACCAGACTTGCCCTCCAA	LR736527	KM600192.1	Uncultured Glomeromycota clone S-WB1-57 18S ribosomal RNA gene, partial sequence	100	97.305	2.63e-158	gb|DQ336490	100	95.509	2.56e-152	Glomerales	Glomeraceae	Glomus	Kottke08-17	VTX00124
OTU127	CCCAACTATCCCTATTAATCATTACGTCAATCCTAGAAACCAACAAAATAGAATCAAACGTCCTATTTCATTATTCCATGCTAATGTATTCAAGCGTAAGCCTGCTTTAAACACTCTAATTTTTTCAAAGTAACAGTCCTGATTCCCCACGACACCAAATTAATGACATCGCAGTTCTTCAGAAGGTAGGAACCAATAATACCAGTGCGTACCGACACTCTGATCCCGAAATTCAACTACGAGCTTTTTAACTGCAACAACTTTAATATACGCTATTGGAGCTGGAATTACCGCAGCTGCTGGCACCAGACTTGCCCTCCAA	LR736528	KM522342.1	Uncultured Glomeromycota clone R-KS2-43d 18S ribosomal RNA gene, partial sequence	100	91.642	2.66e-123	gb|LN620331	93	95.349	1.17e-135	Glomerales	Glomeraceae	Glomus	sp.	VTX00142
OTU128	CCCAACTATCCCTATTAATCATTACGTCGATCCTAGAAACCAACAAAATAGAATCAAACGTCCTATTTCATTATTCCATGCTAATGTATTCAAGCGCGAGCCTGCTTTAAACACTCTAATTTTTTCAAAGTAACAGTCCTGATTCCCCACGACACCAAATTAATGACATCGTGAGTAGGAATCAATTTGACCAGTACGTACCGAGGCACGACCGACCAACAGATCCCGAAATTCAACTACGAGCTTTTTAACTGCAACAACTTTAATATACGCTATTGGAGCTGGAATTACCGCGGCTGCTGGCACCAGACTTGCCCTCCAA	LR736529	KF467293.1	Uncultured Glomeromycota clone VD-336 18S ribosomal RNA gene, partial sequence	100	99.379	2.51e-163	gb|KF467293	100	99.379	2.41e-167	Glomerales	Glomeraceae	Glomus	Shi14b Glo-9	VTX00135
OTU129	CCCAACTATCCCTATTAATCATTACGTCAATCCTAGAAACCAACAAAATAGGATTAACGTCCTATTTCATTATTCCATGCTAATGTATTCAAGCGTGAGCCTGCTTTAAACACTCTAATTTTTTCAAAGTAACAGTCCTGACTCCCCACCACAACAAATTAATAACATGATGGTTTGTCAGAAGGTAAGAATCAGTAACACCAGTACGTACCAAAGGTACAACTAACGTACTAATCCTGAAATTCAACTACGAGCTTTTTAACTGCAACAACTTTAATATACGCTATTGGAGCTGGAATTACCGCGGCTGCTGGCACCAGACTTGCCCTCCAA	LR736530	KM600124.1	Uncultured Glomeromycota clone S-WA3-36 18S ribosomal RNA gene, partial sequence	100	96.396	9.5e-153	gb|GU353719	100	96.096	4.24e-155	Glomerales	Glomeraceae	Glomus	LES15	VTX00219
OTU130	CCCAACTATCCCTATTAATCATTACGTCAATCCTAGAAACCAACAAAATAGGATCAAACGTCCTATTTCATTATTCCATGCTAATGTATTCAAGCCTTAGCCTGCTTTAAACACTCTAATTTTTTCAAAGTAACAGTCCTGATTTCCTGCAACACCAAATTAATGACATTACAGTTCGTCAAGAGGGAGGAATCAGTGAGACCAGTACATACCAGAGGCATGAGCAACCTACTAATCCCGAAATTCAACTACGAGCTTTTTAACTGCAACAACTTTAATATACGCTATTGGAGCTGGAATTACCGCGGCTGCTGGCACCAGACTTGCCCTCCAA	LR736531	AB909096.1	Uncultured Glomeromycota gene for 18S ribosomal RNA, partial sequence, clone: TA03-04-05	100	99.701	1.2e-171	gb|AB555677	100	99.102	2.49e-172	Glomerales	Glomeraceae	Glomus	sp.	VTX00223
OTU131	CCCAACTATCCCTATTAATCATTACGGTGATCCTAGAAACCAACAAAATAGAACCAACGTCCTATTCTATTATTCCATGCTAATCTATTCAAGCAAATGCCTGCTTTAAACACTCTAATTTTTTCAAGGTAATGGTCCTGGCTCCCCGGTACACTCAATAAAGAACATGCCGGTTCACCAGAAGGTAAGACCCGACACAGAACAGTACTCGCCAAAGACGGACCGCCCGGCCAGGCCTAAAATTCAACTACGAGCTTTTTAACTGCAACAACTTTAATATACGCTATTGGAGCTGGAATTACCGCGGCTGCTGGCACCAGACTTGCCCTCCAA	LR736532	KC708375.1	Uncultured Glomeromycota clone A 18S ribosomal RNA gene, partial sequence	100	98.498	7.24e-164	gb|KC708375	100	98.498	6.94e-168	Archaeosporales	Archaeosporaceae	Archaeospora	sp.	VTX00009
OTU132	CCCAACTATCCCTATTAATCATTACGGTGATTCAGAAACCAACAAAACAGGACCACCGTCCTATTTTATTATTCCATGTTAATGTATTCAGACGTAAGCCTGCTTTGAACACTCTAATTTTTTCAAGGTAAAGGTCCTGGTTTTCCACCACGCTAAATTAATAACAGGTTCCCAAGAAGGTAGAAATTCCACACGCCAATACAGACTATTGCCCGACCAACGGTAGAACCCCAAAATTCAATTACGAGCTTTTTAACTGCAACAACTTTAATATACGCTATTGGAGCTGGAATTACCGCGGCTGCTGGCACGACTTGCCCTCCAA	LR736533	KM600067.1	Uncultured Glomeromycota clone S-WA2-45 18S ribosomal RNA gene, partial sequence	100	96.677	1.2e-151	gb|X58726	100	96.073	2.48e-152	Diversisporales	Gigasporaceae	Gigaspora	rosea	VTX00039
OTU133	CCCAACTATCCCTATTAATCATTACGTTGATCCTAAAAACCAACAAAATAGGTTCGAACGTCCTATTTCATTATTCCATGCTAATGTATTCAAGCTAATGCCTGCTTTAAACACTCTAATTTTTTCAAAGTAACAGTCCTGATTTCCCATAACACCAAATTAATGACATCATGGTTCGTCAGAAGGGAGAAATCGATGACGACAGTACGTACCGAAGGCACGACCGACGTATCGATCCCGAAATTCAACTACGAGCTTTTTAACTGCAACAACTTTAATATACGCTATTGGAGCTGGAATTACCGCGGCTGCTGGCACCAGACTTGCCCTCCA	LR736534	KJ817395.1	Uncultured Glomeromycota clone SF-85 18S ribosomal RNA gene, partial sequence	100	99.099	9.3e-168	gb|FJ875128	100	98.799	4.15e-170	Glomerales	Glomeraceae	Glomus	sp.	VTX00191
OTU134	CCCAACTATCCCTATTAATCATTACGGCGGTCCTAGAAACCAACAAAATAGTACCACGCGTCCTATTTCATTATTCCATGCTAATGTATTCGAGCAAACGCCTGCTTTGAACACTCTAATTTTTTCAAGGTAATGGTCCTGGTTCCCCGACACACCCAGCGAAGGGCATGCCGTCTCACCAGAAGGATAGGCCCGGCGTCGGAACAGTGCTCACCCGGAAGGTGGACCGCCCGGCCAGACCCAAAATTCAACTACGAGCTTTTTAACTGCAACAACTTTAATATACGCTATTGGAGCTGGAATTACCGCGGCTGCTGGCACCAGACTTGCCCTCCAA	LR736535	AB047308.1	Archaeospora leptoticha gene for 18S rRNA, isolate: MAFF520058, sub_clone: v111	100	100	5.59e-175	gb|AB047308	100	100	5.36e-179	Archaeosporales	Ambisporaceae	Ambispora	callosa	VTX00242
OTU135	CCCAACTATCCCTATTAATCATTACGGTGATCCTAGAAACCAACAAAATAGAATCAAACGTCCTATTTCATTATTCCATGCTAATGTATTCAAGCGTGCGCTTGCTTTAAACACTCTAATTTTTTCAAAGTAACAGTCCTGATTTCCCACGACACCAAATTAATGACATCGCGGTTCTTCAGAAGGGAGGAACCAATAATACCAGTGCGTACCGAGGCACGACCGACAATTTGATCCCGAAATTCAACTACGAGCTTTTTAACTGCAACAACTTTAATATACGCTATTGGAGCTGGAATTACCGCGGCTGCTGGCACCAGACTTGCCCTCCAA	LR736536	KM600675.1	Uncultured Glomeromycota clone R-BA1-23 18S ribosomal RNA gene, partial sequence	100	99.399	2e-169	gb|JN009334	100	97.898	4.18e-165	Glomerales	Glomeraceae	Glomus	Liu2012b Phylo-12	VTX00143
OTU136	CCCAACTATCCCTATTAATCATTACGTCAATCTTAGAAACCAACAAAATAGGTTCGATCATCTTATTTTATTATTCCATGCTAATGTATTCAAGCGTTAGCCTGCTTTAAACACTCTAATTTTTTCAAAGTAACAGTCCTGTTTCCCTGCAACACCAAATTAATGACATTACAGTTCTTCAAGAAGGAGGAATCAGTAAAGCCAGTACATACCATAGGCACGACCAACCTACTGACCCCGAAATTCAACTACGAGCTTTTTAACTGCAACAACTTTAATATACGCTATTGGAGCTGGAATTACCGCGGCTGCTGGCACCAGACTTGCCCTCCAA	LR736537	KM600072.1	Uncultured Glomeromycota clone S-WA2-50 18S ribosomal RNA gene, partial sequence	100	98.204	2.61e-163	gb|AB555661	100	97.904	1.17e-165	Glomerales	Glomeraceae	Glomus	sp.	VTX00080
OTU137	CCCAACTATCCCTATTAATCATTACGTCGATCCTAGAAACCAACAAAATAGAATCAAACGTCCTATTTCATTATTCCATGCTAATGTATTCAAAAGCGTGCGCCTGCTTTAAACACTCTAATTTTTTCAAAGTAACAGTCCTGATTCCCCATGACACCAAATTAATGACAATCGCGGTTTTTCAGAAGATAGGAACCAATAATGCCAGTGCGTACCAATTGGCACGACCGACAATTTGATCCCGAAATTCAACTACGAGCTTTTTAACTGCAACAACTTTAATATACGCTATTGGAGCTGGAATTACCGCGGCTGCTGGCACCAGACTTGCCCTCCAA	LR736538	KM601302.1	Uncultured Glomeromycota clone R-TB1b-5 18S ribosomal RNA gene, partial sequence	100	99.408	1.22e-171	gb|HQ656918	100	97.337	7.1e-163	Glomerales	Glomeraceae	Glomus	Glomus3	VTX00143
OTU138	CCCAACTATCCCTATTAATTATTACGTTGATCCTAGAAACCAACAAAATAGGATTAACGTCCTATTTCATTATTCCATGCTAATGTATTCAAGCGTTAGCCTGCTTTAAACACTCTAATTTTTTCAAGGTAACAGTTCTGATTTCCCACAACACCAAATTAATGACATCACGGTTTGTCAAGAAGGAGGAATCAGTAAAGCCAGTACATACCGAAGGCATGACTAACTTACTAACCCCAAAATTCATCTACGAGCAACAACTTTAATATATGCCATTGGAGCTGAAATTACCGTGGCTGCTGGCACCAGACTTGCCCTCCAA	LR736539	JN252466.1	Uncultured Glomeraceae clone Late-4 18S ribosomal RNA gene, partial sequence	100	92.793	2.04e-129	gb|JN252466	100	92.793	1.96e-133	Glomerales	Glomeraceae	Glomus	Late-4	VTX00088
OTU139	CCCAACTATCCCTATTAATCATTACGGTGATCCTAGAAACCAACAAAATAGAACCATGCCGTCCTATTCTATTATTCCATGCTAATGTATTCGAGCAATAAGCCTGCTTTAAACACTCTAATTTTTTCAAGGTAAAAGTTCTGGTTCCATATGACACCCAATTAAGGACATCATATTTCTCCAGAAGGTGAGAAATTGACTGCAACAGTTCATACCCCGTAAGGCACGACCATCACGTCAATCCCGAAATTCAACTACGAGCTTTTTAACTGCAACAACTTTAATATACGCTATTGGAGCTGGAATTACCGCGGCTGCTGGCACCAGACTTGCCCTCCAA	LR736540	JN252454.1	Uncultured Glomeraceae clone Early-5 18S ribosomal RNA gene, partial sequence	100	99.706	5.65e-175	gb|JN252454	100	99.706	5.41e-179	Glomerales	Claroideoglomeraceae	Claroideoglomus	Early-5	VTX00055
OTU140	CCCAACTATCCCTATTAATCATTACGTCGATCCTAGAAACCAACAAAATAGGGTCAAACGTCCTATTTCATTATTCCATGCTAATGTATTCAAGCGCGAGCCTGCTTTAAACACTCTAATTTTTTCAAAGTAACAGTCCTGATTCCCCGCCACACCAACTGAATGGCATGACGGTTCTTCAGAAGGGAGAAACCAGTGACACCAGTGCATACCGAAGGCACGACCAGCGTACTGATCTCGAAATTCAACTACGAGCTTTTTAACTGCAACAACTTTAATATACGCTATTGGAGCTGGAATTACCGCGGCTGCTGGCACCAGACTTGCCCT	LR736541	KM602068.1	Uncultured Glomeromycota clone S-TA1-22 18S ribosomal RNA gene, partial sequence	100	100	4.26e-171	gb|AB749496	100	100	4.08e-175	Glomerales	Glomeraceae	Glomus	Goomaral13b Glo 11	VTX00214
OTU141	CCCAACTATCCCTATTAATCATTACGTCGATCCTAGAAACCAACAAAATAGAATCATGCCGTCCTATTCTATTATTCCATGCTAATGTATTCGAGCAAAATGCCTGCTTTAAACACTCTAATTTTTTCAAGGTAAAGGTCCTGGTTCCACATGACACCCAATTAAGGACATCATGCTTCTCCAGAAGGTGAGAAATCAACTGCGACAGTTCATACCCCTTAAGGCACGACCATCACGTCAATCCCGAAATTCAACTACGAGCTTTTTAACTGCAACAACTTTAATATACGCTATTGGAGCTGGAATTACCGCGGCTGCTGGCACCAGACTTGCCCTCCAA	LR736542	JN788679.1	Uncultured Glomus clone EJJ46 18S ribosomal RNA gene, partial sequence	100	99.412	2.63e-173	gb|EF041095	100	98.824	5.45e-174	Glomerales	Claroideoglomeraceae	Claroideoglomus	Glo59	VTX00276
OTU142	CCCAACTATCCCTATTAATCATTACGGTGATCCTAGAAACCAACAAAATAGAACCATACCGTCCTATTCTATTATCCCATGCTAATGTATTCGAGCAAAAATGCCTGCTTTAAACAAACACTCTAATTTTTTCAAGGTAAAGGTCCTGGATCCGCAAGACACCCAATAAAGGACATCAAGTTTCTCCAGAAGGTGAGAAATCAACAGTAACAGTTCATACCCCTTAAGGCATACCATCACGTCAATCCCGAAATTCAACTACGAGCTTTTTAACTGCAACAACTTTAATATACGCTATTGGAGCTGGAATTACCGCGGCTGCTGGCACCAGACTTGCCCTCAA	LR736543	KM602028.1	Uncultured Glomeromycota clone R-TF3b-17 18S ribosomal RNA gene, partial sequence	99	98.534	9.61e-168	gb|JN009457	99	97.953	1.99e-168	Glomerales	Claroideoglomeraceae	Claroideoglomus	Liu2012b Phylo-22	VTX00056
OTU143	CCCAACTATCCCTATTAATCATTACGTCGATCCTAGAAACCAACAAAATAGGGTCAAACGTCCTATTTCATTATTCCATGCTAATGTATTCAAGCGTGAGCCTGCTTTAAACACTCTATGTAACAGTCCTGATTCCCCGCGACACCAAATTAATGACATCACGGATCTTCAGAAGGGAGAAACCAGTGACACCAGTGCATACCAAAGGCATGACCAGCGTACTGATCCCGAAATTCAACTACGAGCTTTTTAACTGCAACAACTTTAATATACGCTATTGGAGCTGGAATTACCGCGGCTGCTGGCACCAGACTTGCCCTCCAA	LR736544	KM601415.1	Uncultured Glomeromycota clone R-TB3b-20 18S ribosomal RNA gene, partial sequence	100	97.006	7.13e-154	gb|KF467273	100	97.006	6.84e-158	Glomerales	Glomeraceae	Glomus	Shi14b Glo-3	VTX00212
OTU144	CCCAACTATCCCTATTAATCATTACGTCAATCCTAGAAACCAACAATAAGATTAAACGTCCTATTTTATTATTCCATGCTAATATATTCAAGCTTTAAAAACCTGCTTTAAACACTCTAATTTTTTCAAAGTAACAGTCCTGAACTAATTACAACATCAAATTAATGACATTATAGTTTATCAGAAGGGAGAAATCAATAAAAATCAGTACGTATCATAGATACGACCAATTAATTAATTCCGAAATTCAACTACGAGCTTTTTAACTGCAACAACTTTAATATACGCTATTGGAGCTGGAATTACCGCGGCTGCTGGCACCAGACTTGCCCTCCAA	LR736545	KF939915.1	Uncultured Glomeromycota clone 115 18S ribosomal RNA gene, partial sequence	100	100	5.59e-175	gb|KF467255	100	89.971	3.49e-121	Glomerales	Glomeraceae	Glomus	Shi14b Glo-7	VTX00129
OTU145	CCCAACTATCCCTATTAATCATTACATCGATCCTAGAAACCAACAAAATAGAATCAAAACGTCCTATTTCATTATTCCATGCTAATGTATTCAAGCGTAAGCCTGCTTTAAACACTCTAATTTTTTCAAAGTAACAGTCCTGATTCCCCATGACACCAAATTAATGACATCATGGTTCGTCAGAAGGGAGAAATCAATAAGCTAGTACGTACCAAAGGCACGACCAACATATTGATCCCGAAATTCAACTACGAGCTTTTTAACTGCAACAACTTTAATATACGCTATTGGAGCTGGAATTACCGCGGCTGCTGGCACCAGACTTGCCCTCCA	LR736546	KM601305.1	Uncultured Glomeromycota clone R-TB1b-8 18S ribosomal RNA gene, partial sequence	100	99.7	4.3e-171	gb|JX999414	100	98.799	1.49e-169	Glomerales	Glomeraceae	Glomus	sp.	VTX00159
OTU146	CCCAACTATCCCTATTAATCATTACGTCAATCCTAGAAACCAACAAAATAGAATCAAACGTCCTATTTCATTATTCCATGCTAATGTATTCAAGCGTGCGCCTGCTTTAAACACTCTAATTTTTTCAAAGTAACAGTCCTGATTCCCCACGACACCAAATTAATGACATCGCGGTTCTTCAGAAGGTAGGAACCAATAATGCCAGTACGTACCGAGGCACGACCGACAGTCTGATCCCGAAATTCAACTACGAGCTTTTTAACTGCAACAACTTTAATATACGCTATTGGAGCTGGAATTACCGCGGCTGCTGGCACCAGACTTGCCCAA	LR736547	AB749505.1	Uncultured Glomus gene for 18S ribosomal RNA, partial sequence, clone: P18-71s	99	99.695	2.56e-168	gb|AB749505	99	99.695	2.46e-172	Glomerales	Glomeraceae	Glomus	Goomaral13b Glo 15
OTU147	CCCAACTATCCCTATTAATCATTACGTCGATCCTAGAAACCAACAAAATAGAATCAAACGTCCTATTTCATTATTCCATGCTAATGTATTCAAGCGCGAGCTTGCTTTAAACACTCTAATTTTTTCAAAGTAACAGTCCTGATTTCCCGCGACACCAAATTAATGACATCGTGGTTCGTCAGAAGGGAGAAACCAATAATGCTAGTACGTACAAAGTACGACCAGTAAGCCGGTCTCGAAATTCAACTACGAGCTTTTTAACTGCAACAACTTTAATATACGCTATTGGAGCTGGAATTACCGCGGCTGCTGGCACCAGACTTGCCCTCCAA	LR736548	KF467285.1	Uncultured Glomeromycota clone VD-15 18S ribosomal RNA gene, partial sequence	100	96.988	1.57e-155	gb|KF467285	100	96.988	1.51e-159	Glomerales	Glomeraceae	Glomus	Shi14b Glo-14	VTX00177
OTU148	CCCAACTATCCCTATTAATCATTACTCCAGCAGCTGCGGTAATTCCAGCTCTAATAGCGTATATTAAAGTTGTTGCAGTTAAAAAGTTCGTAGTTGAATTTCGGGATCAAATTGTCGGTCATGCTTCGGTACGCACTGGCATTATTGGTTCCTACCTTCTGAAGAACCACGATGTCATTAATTTGGTGTCGTGGGGAATCAGGACTGTTACTTTGAAAAAATTAGAGTGTTTAAAGTAGGCGCACGCTTGAATACATTAGCGTGGAATAATGAAATAGGACGTTTGATTCTATTTTGTTGGTTTCTAGGATCGACGTAATGATTAATAGGGATAGTTGGGAGAGTAGCTAAG	LR736549	KM600866.1	Uncultured Glomeromycota clone R-BC1b-32 18S ribosomal RNA gene, partial sequence	89	97.452	7.87e-149	gb|LN621055	89	97.756	2.09e-153	Glomerales	Glomeraceae	Glomus	sp.	VTX00143
OTU149	CCCAACTATCCCTATTAATCATTACGTCGATCCTAGAAACCAACAAAATAGGGTCAAACGTCTTATTTCATTATTCCATACTAATGTATTCAAGCTAATGCCTGCTTTAAACACTCTAATTTTTTCAAAGTAACAGTCCTAACTCCCCATAATACCAAATTAATGACATCATGGTTCGTCAGAAGGGAGAAATCAATGATACCAGTACGTACCAGAGACACGACCGATATATTGATCCCAAAATTCAACTACGAGCTTTTTAACTGCAACAACTTTAATATACGCTATTGGAGCTGGAATTACCACGGCTGCTGGCACCAGACTTGCCCTCCA	LR736550	AB914759.1	Uncultured Glomeromycota gene for 18S ribosomal RNA, partial sequence, clone: TA03-03-01	100	97.598	2.03e-159	gb|AB546440	100	97.297	9.04e-162	Glomerales	Glomeraceae	Glomus	sp.	VTX00194
OTU150	CCCAACTATCCCTATTAATCATTACGTCAATCCTAGAAACCAACAAAATAGGATCAAACGTCCTATTTCATTATTCCATGCTAACGCTTGAATACATTAGCATGGAATAATGAAATAGGACGTTTGATCCTATTTCATTATTCCATGCTAATGTATTCAAGCGTTAGCCTGCTTTAAACACTCTAATTTTTTCAAAGTAACAGTCCTGTTTCCCTGCAACACCAAATTAATGACATTACAGTTCTTCAAGAAGGAGGAACCAGTAAAGCCAGTACATACCAGAGGCACGACCAACTTACTAATCCCGAAATTCAACTACGAGCTTTTTAACTGCAACAACTTTAATATACGCTATTGGAGCTGGAATTACCGCGGCTGCTGGCACCAGACTTGCCCTCC…	LR736551	KM600173.1	Uncultured Glomeromycota clone S-WB1-34 18S ribosomal RNA gene, partial sequence	100	100	7.12e-140	gb|AB555655	100	100	6.78e-144	Glomerales	Glomeraceae	Glomus	sp.	VTX00080
OTU151	CCCAACTATCCCTATTAATCATTACGTCAATCCTAGAAACCAACAAAATAGGATCAAACGTCCTATTTCATTATTCCATGCTAATGTATTCAAGCGTTAGCCTGCTTTAAACACTCTAATTTTTTCAAAGTAACAGTCCTGATTTCCCGCCACACCAAATTAATGACATGACGGTTCGTCAGAAGGGAGGAATCAGAAACACCAGTACATACCAGAGGCACGACCAGCGCACTGATCCCGAAATTCAACTACGAGCTTTTTAACTGCAACAACTTTAATATACGCTATTGGAGCTGGAATTACCGCGGCTGCTGGCACCAGACTTGCCCTCCAA	LR736552	KM602355.1	Uncultured Glomeromycota clone S-TB3-88 18S ribosomal RNA gene, partial sequence	100	97.605	2.04e-159	gb|AB749508	100	97.605	1.95e-163	Glomerales	Glomeraceae	Glomus	Goomaral13b Glo 11	VTX00093
OTU152	CCCAACTATCCCTATTAATCATTACCGTGGCCGTCAAAACCAACGAAATAAGACCACGGTCCTATTCCATTATTCCATGCTAATCTATTCGAGCTTGCGCCCGCTTTGAACACTCTAATTTTTTCAAGGTAAACGTCTTGGCTCCGCGACACGCCGCCCTCGCGGACGGCGCCCCGCCTCCCCAAGAGGAAAGGACCGGCCCATGAGCAGTGCTCACCTTGCGGTGGACCGCCCGGCCAGACCCAAACTTCGACTACGAGCTTTTTAACTGCAACAACTTTAATATACGCTATTGGAGCTGGAATTACCGCGGCTGCTGGCACCAGACTTGCCCTCCAA	LR736553	AB047308.1	Archaeospora leptoticha gene for 18S rRNA, isolate: MAFF520058, sub_clone: v111	100	85.63	8.16e-94	gb|AB047308	100	85.63	7.81e-98	Archaeosporales	Ambisporaceae	Ambispora	callosa	VTX00242
OTU153	CCCAACTATCCCTATTAATCATTACGTGGTCCTAAAACCAACAAAATAGAACACCGTCCTATTTTATTATTCCATGCTAATGTATTCAAGCAAAAATGCCCGCTTTAAACACTCTAATTTTTTCAAAGTAAAGGTCCTAGTTCATTGAAACACCCAATAAAGAAGCATCCCAATTCACCAGAAGGTAAGAAATTGGCTACACACCGATTCATGCCCCTAAAAGCACGACCAATATATCCCAATCCCGAAATTCAACTACGAGCTTTTTAACCGCAACAACACTAATATACGCTATCGGAGCTGGAATAATAGAATAGGACGGCATGGTTCTATTTTGTTGGTTTCTAGGATCACCGTAATGATTAATAGGGATAGTTGGGATCT	LR736554	KJ740899.1	Uncultured Glomeromycota clone 2013.FS.ZD91-4.51 18S small subunit ribosomal RNA gene, partial sequence	80	100	3.07e-158	gb|HE615073	80	94.498	8.49e-133	Glomerales	Claroideoglomeraceae	Claroideoglomus	Torrecillas12b Glo G7	VTX00402
OTU154	CCCAACTATCCCTATTAATCATTACGTTAATCCTAGAAACCAACAAAATAGGATCCACGTCCTATTTCATTATTCCATGCTAATGTATTCAAGCGTTAGCCTGCTTTAAACACTCTAATTTTTTCAAAGTAACAGTCCTGTTTCCCTGCAACAACAAATTAATGCCATCACAGTTCTACAAGAAGGAGGAATCGGTAAGGCCAGTACATACCATAGGCACGACCAACCTACCGACCCCGAAATTCAACTACGAGCTTTTTAACTGCAACAACTTTAATATACGCTATTGGAGCTGGAATTACCGCGGCTGCTGGCACCAGACTTGCCCTCCAA	LR736555	KM600461.1	Uncultured Glomeromycota clone S-WC3-56 18S ribosomal RNA gene, partial sequence	100	97.006	4.39e-156	gb|LN615489	94	99.679	1.94e-163	Glomerales	Glomeraceae	Glomus	sp.	VTX00082
OTU155	CCCAACTATCCCTATTAATCATTACGGTGATCCTAGAAACCAACAAAATAGAACCATGCCGTCCTATTCTATTATTCCAGCTCCAATAGCGTATATTAAAGTTGTTGCAGTTAAAAAGCTCGTAGTTGAATTTCGGGATTAGTACGCTGGTCGTGCCTTCGGTACGTACTGGTGTTACTGATTTCTACCTTCTGACGAACCATCATGTCATTAATTTGGTGTGGTGGGGAATCAGGACTGTTACTTTGAAAAAATTAGAGTGTTTAAAGCAGGCTCGCGCTTGAATACATTAGCATGGAATAATGAAATAGGACGTTGATCCTATTTTGTTGGTTTCTAGGATTGACGTAATGATTAATAGGGATAGTTGGGCGTACAGTTATC	LR736556	KM600603.1	Uncultured Glomeromycota clone S-WD3-10 18S ribosomal RNA gene, partial sequence	78	100	8.6e-154	gb|AJ866190	78	99.331	4.93e-155	Glomerales	Glomeraceae	Glomus	Santos2006 Glo2	VTX00219
OTU156	CCCAACTATCCCTATTAATCATTACGTCAATCCTAGAAACCAACAAAATAGGACGTTCGATCCTATTTCATTATTCCATGCTAATGTATTCAAGCGTTAGCTTGCTTTAAACACTCTAATTTTTTCAAAGTAACAGTCCAGATTCCTCGCAACACCAAATTAATGGCATTACGGCTCATCAGGAAGGAGGAATCAGTGAGACCAGTACATACCAGTGGCATGACCAACCTACTAACCCCGAAATTCAACTACGAGCTTTTTAACTGCAACAACTTTAATATACGCTATTGGAGCTGGAATTACCGCGGCTGCTGGCACCAGACTTGCCCTCCAA	LR736557	KM522644.1	Uncultured Glomeromycota clone R-LP4b-34 18S ribosomal RNA gene, partial sequence	100	98.806	1.21e-166	gb|GU238385	100	98.806	1.16e-170	Glomerales	Glomeraceae	Glomus	Glo-A2	VTX00295
